# Supplementary material for: (1E)-1,2-Diaryldiazene Derivatives Containing a Donor–π-Acceptor-Type Tolane Skeleton as Smectic Liquid–Crystalline Dyes
Source: MDPI journal article supplement (doi:10.3390/compounds4020015), 2024-04-17
Supplement: s1 [file s1]

# *Supplementary Information*

## **(1E)-1,2-Diaryldiazene Derivatives Containing a Donor– $\pi$ -Acceptor-Type Tolane Skeleton as Smectic Liquid–Crystalline Dyes**

Shigeyuki Yamada <sup>1,\*</sup>, Keigo Yoshida <sup>1</sup>, Yuto Eguchi <sup>1</sup>, Mitsuo Hara <sup>2,3</sup>, Motohiro Yasui <sup>1</sup> and Tsutomu Konno <sup>1</sup>

<sup>1</sup> Faculty of Molecular Chemistry and Engineering, Kyoto Institute of Technology, Matsugasaki, Sakyo-ku, Kyoto 606-8585, Japan; m2673040@edu.kit.ac.jp (K.Y.); b0151021@edu.kit.ac.jp (Y.E.); myasui@kit.ac.jp (M.Y.); konno@kit.ac.jp (T.K.)

<sup>2</sup> Department of Molecular and Macromolecular Chemistry, Graduate School of Engineering, Nagoya University, Furo-cho, Chikusa-ku, Nagoya 464-8603, Japan; mhara@chembio.nagoya-u.ac.jp

<sup>3</sup> Faculty of Engineering and Design, Kagawa University, 2217-20, Hayashi-cho, Takamatsu 761-0396, Japan

\* Correspondence: syamada@kit.ac.jp

### **Table of Contents**

|                           |       |      |
|---------------------------|-------|------|
| Experimental              | ••••• | S-2  |
| NMR spectrum              | ••••• | S-4  |
| Phase transition behavior | ••••• | S-12 |
| Powder X-ray diffraction  | ••••• | S-18 |
| Photophysical behavior    | ••••• | S-19 |
| Theoretical study         | ••••• | S-22 |
| Cartesian coordinate      | ••••• | S-24 |

## Experimental

### General method

<sup>1</sup>H nuclear magnetic resonance (NMR) (400 MHz) and <sup>13</sup>C NMR (100 MHz) spectra were acquired using an AVANCE III 400 NMR spectrometer (Bruker, Rheinstetten, Germany) in a chloroform-*d* (CDCl<sub>3</sub>) solution, and chemical shifts were reported in parts per million (ppm) based on the residual protons or carbon in the NMR solvent. <sup>19</sup>F NMR (376 MHz) spectra were acquired using an AVANCE III 400 NMR spectrometer (Bruker, Rheinstetten, Germany) in CDCl<sub>3</sub> solution with CFCl<sub>3</sub> ( $\delta$  = 0 ppm) or C<sub>6</sub>F<sub>6</sub> ( $\delta$  = -163 ppm) as an internal standard. Infrared (IR) spectra were recorded using the KBr method on an FTIR-4100 type A spectrometer (JASCO, Tokyo, Japan). All IR spectra are reported in wavenumber (cm<sup>-1</sup>) units. High-resolution mass spectra (HRMS) were recorded on a JMS700MS spectrometer (JEOL, Tokyo, Japan) using the fast atom bombardment (FAB) method. Before use, all chemicals were reagent-grade and purified using standard methods. Melting temperature (*T*<sub>m</sub>) was measured using a DSC-60 differential scanning calorimeter (SHIMADZU, Kyoto, Japan) under a nitrogen atmosphere at a scan rate of 5 °C min<sup>-1</sup>. The progress of the reaction was monitored by thin-layer chromatography (TLC) on silica gel TLC plates (Merck, Silica Gel, 60F<sub>254</sub>; New Jersey, NJ, USA). Column chromatography was performed using silica gel (FUJIFILM Wako Pure Chemical Corporation, Wako-gel® 60 N, 38 µm to 100 µm; Osaka, Japan).

### Typical synthetic procedure for 4-amino-4'-decyloxydiphenylacetylene (3a)

In a two-necked round-bottomed flask, equipped with a Teflon®-coated stirring bar, was placed 4-decyloxy-1-iodobenzene (3.24 g, 9.0 mmol), Cl<sub>2</sub>Pd(PPh<sub>3</sub>)<sub>2</sub> (0.32 g, 0.45 mmol), PPh<sub>3</sub> (0.12 g, 0.45 mmol), Et<sub>3</sub>N (2.5 mL) and THF (35 mL). To the solution was added CuI (0.17 g, 0.90 mmol) and 4-ethynylaniline (1.26 g, 11 mmol), and the solution was stirred at 80 °C for 18 h. After being stirred for 18 h, precipitate formed during the reaction was separated by atmospheric filtration, and the filtrate was poured into saturated aqueous NH<sub>4</sub>Cl solution. The crude product was extracted with Et<sub>2</sub>O (50 mL) three times. The combined organic layer was dried over anhydrous sodium sulfate (Na<sub>2</sub>SO<sub>4</sub>), filtered under atmospheric pressure, and evaporated under reduced pressure using a rotary evaporator. The residue was subjected to silica-gel column chromatography using hexane/CH<sub>2</sub>Cl<sub>2</sub> 1/1 (v/v) mixed solvent as an eluent, followed by recrystallization from CHCl<sub>3</sub>/hexane (*v/v* = 1/1), producing the coupling product **3a** in 40% (1.26 g, 3.6 mmol) as a white solid.

### 4-Amino-4'-decyloxydiphenylacetylene (3a)

Yield: 40% (white solid); *T*<sub>m</sub>: 87–88 °C (observed by POM); <sup>1</sup>H NMR (CDCl<sub>3</sub>): *d* 0.88 (t, *J* = 7.2 Hz, 3H), 1.23–1.38 (m, 10H), 1.45 (quin, *J* = 7.2 Hz, 2H), 1.78 (quin, *J* = 6.8 Hz, 2H), 3.79 (brs, 2H), 3.95 (t, *J* = 6.8 Hz, 2H), 6.63 (d, *J* = 8.4 Hz, 2H), 6.84 (d, *J* = 8.8 Hz, 2H), 7.31 (d, *J* = 8.4 Hz, 2H), 7.41 (d, *J* = 8.8 Hz, 2H); <sup>13</sup>C NMR (CDCl<sub>3</sub>): *d* 14.1, 22.7, 26.0, 29.2, 29.3, 29.4, 29.5, 29.6, 31.9, 68.0, 87.2, 88.4, 113.0, 114.4, 114.7, 115.7, 132.70, 132.73, 146.3, 158.8; IR (KBr): *n* 3468, 3030, 2953, 2881, 1609, 1518, 1320, 1246, 1190, 1040, 947, 834 cm<sup>-1</sup>; HRMS (FAB) Calcd for (M<sup>+</sup>) C<sub>24</sub>H<sub>31</sub>NO: 349.2406, Found: 349.2412.

### 4-Amino-4'-(7,7,8,8,9,9,10,10,10-nonafluorodecyloxy)diphenylacetylene (3b)

Yield: 50% (white solid); *T*<sub>m</sub>: 124–125 °C (observed by POM); <sup>1</sup>H NMR (CDCl<sub>3</sub>): *d* 1.41–1.59 (m, 4H), 1.65 (quin, *J* = 7.6 Hz, 2H), 1.81 (quin, *J* = 6.8 Hz, 2H), 1.99–2.15 (m, 2H), 3.79 (brs, 2H), 3.97 (t, *J* = 6.8 Hz, 2H), 6.63 (d, *J* = 8.8 Hz, 2H), 6.84 (d, *J* = 8.8 Hz, 2H), 7.31 (d, *J* = 8.8 Hz, 2H), 7.42 (d, *J* = 8.8 Hz, 2H); <sup>13</sup>C NMR (CDCl<sub>3</sub>): *d* 20.1,

25.7, 28.8, 29.0, 30.7 (t,  $J = 22.0$  Hz), 67.7, 87.2, 88.5, 113.0, 114.4, 114.8, 115.9, 132.7, 132.8, 146.3, 158.6, and the four signals that should be assigned to  $C_4F_9$  are split by the F atoms, and their intensities are too low for accurate assignment;  $^{19}F$  NMR ( $CDCl_3$ ,  $C_6F_6$ ):  $\delta$  -82.33 (t,  $J = 9.4$  Hz, 3F), -115.80 to -116.08 (m, 2F), -125.71 to -125.89 (m, 2F), -127.28 to -127.46 (m, 2F); IR (KBr):  $\nu$  3344, 2943, 2867, 1609, 1519, 1319, 1284, 1247, 1133, 1046, 839  $cm^{-1}$ ; HRMS (FAB) Calcd for ( $M^+$ )  $C_{24}H_{22}F_9NO$ : 511.1558, Found: 511.1557.

**4-Amino-4'-(5,5,6,6,7,7,8,8,9,9,10,10,10-tridecafluorodecyloxy)diphenylacetylene (3c)**

Yield: 13% (white solid);  $T_m$ : 158–160  $^{\circ}C$  (observed by POM);  $^1H$  NMR ( $CDCl_3$ ):  $\delta$  1.78–1.93 (m, 4H), 2.08–2.26 (m, 2H), 3.79 (brs, 2H), 4.01 (t,  $J = 6.0$  Hz, 2H), 6.63 (d,  $J = 8.8$  Hz, 2H), 6.84 (d,  $J = 8.8$  Hz, 2H), 7.31 (d,  $J = 8.8$  Hz, 2H), 7.42 (d,  $J = 8.8$  Hz, 2H);  $^{13}C$  NMR ( $CDCl_3$ ):  $\delta$  17.3, 28.7, 30.7 (t,  $J = 22.0$  Hz), 67.2, 88.6, 97.2, 113.0, 114.4, 114.8, 117.2, 132.8, 137.9, 146.4, 158.4, and the six signals that should be assigned to  $C_6F_{13}$  are split by the F atoms, and their intensities are too low for accurate assignment;  $^{19}F$  NMR ( $CDCl_3$ ,  $C_6F_6$ ):  $\delta$  -82.06 (t,  $J = 9.8$  Hz, 3F), -115.60 to -115.86 (m, 2F), -123.09 to -123.36 (m, 2F), -124.06 to -124.25 (m, 2F), -124.74 to -124.92 (m, 2F), -127.37 to -127.52 (m, 2F); IR (KBr):  $\nu$  3343, 3033, 2954, 2850, 2212, 1608, 1518, 1475, 1319, 1249, 1172, 1024, 997, 841  $cm^{-1}$ ; HRMS (FAB) Calcd for ( $M^+$ )  $C_{24}H_{18}F_{13}NO$ : 583.1181, Found: 583.1191.

## NMR spectrum

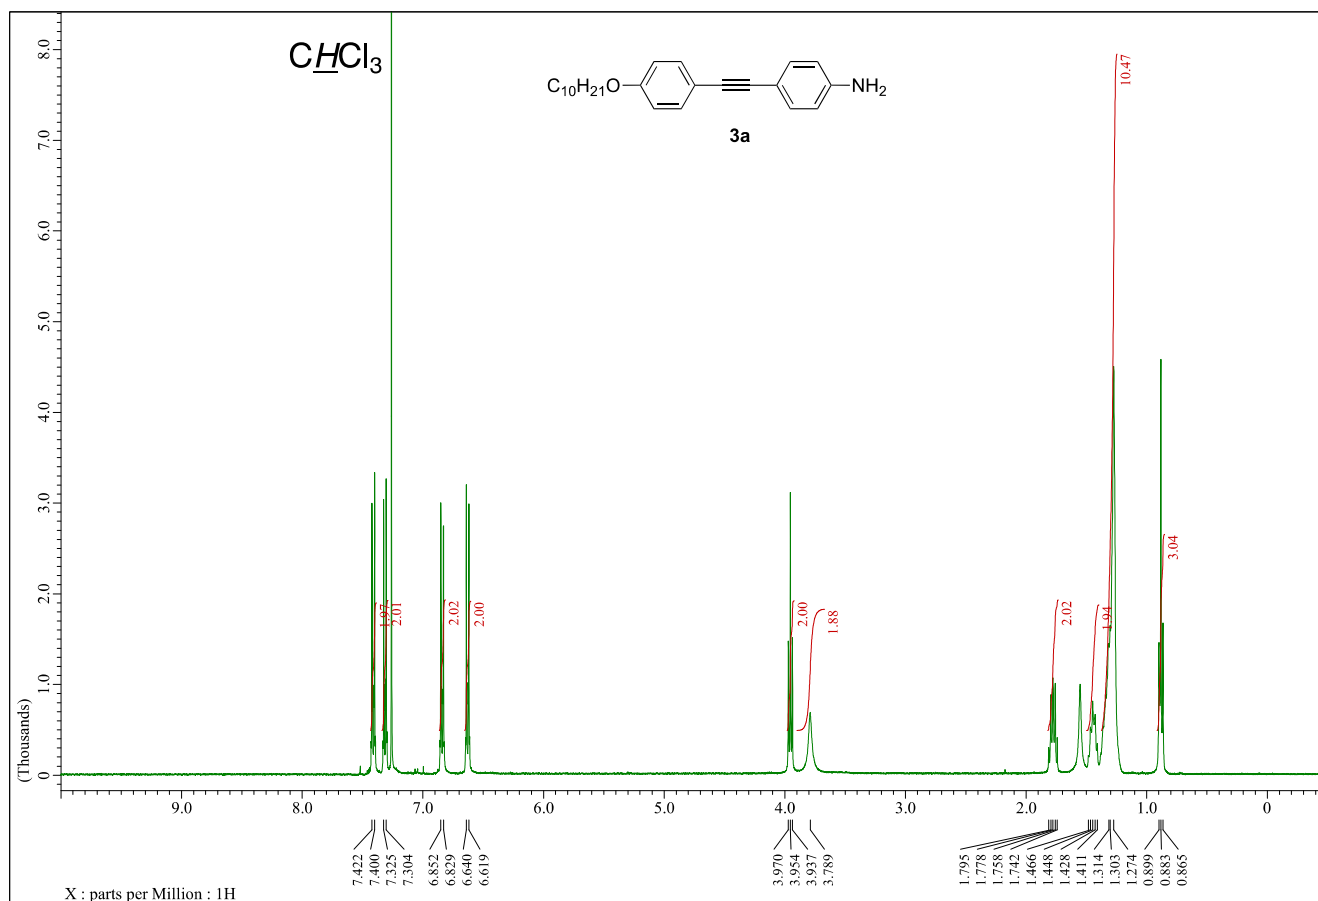

**Figure S1.**  $^1\text{H}$  NMR spectrum of **3a** (400 MHz,  $\text{CDCl}_3$ )

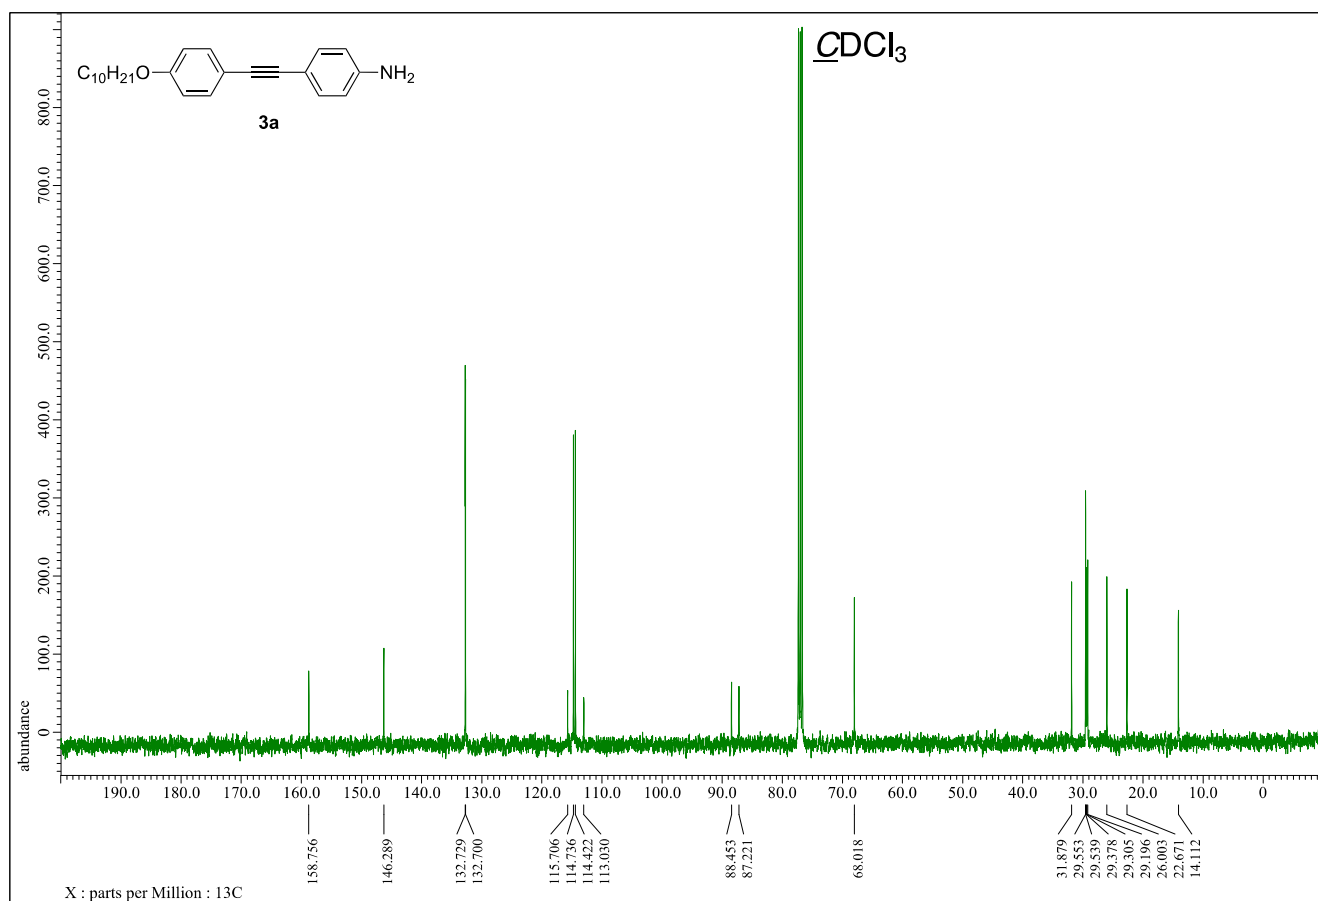

**Figure S2.**  $^{13}\text{C}$  NMR spectrum of **3a** (100 MHz,  $\text{CDCl}_3$ )

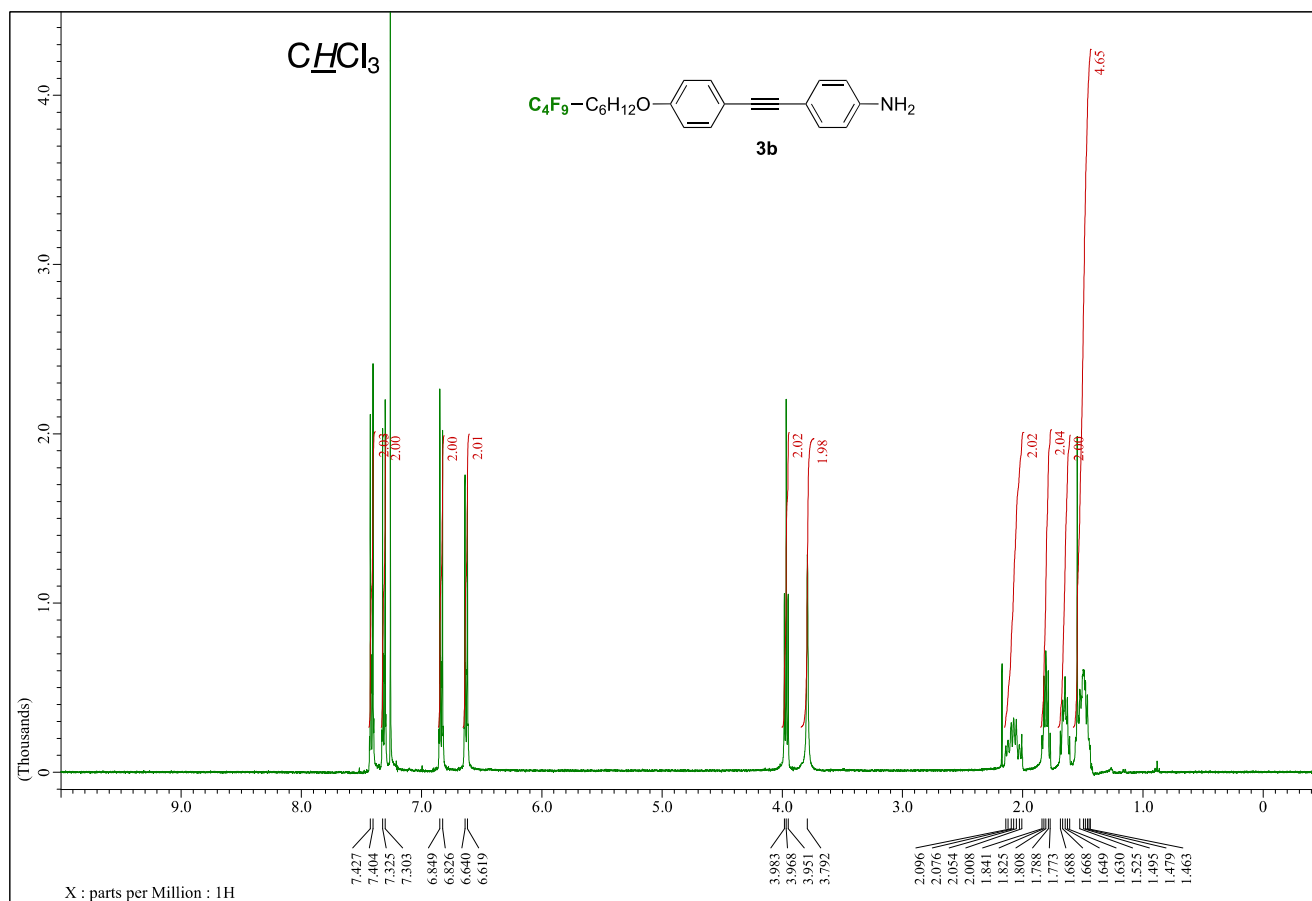

**Figure S3.** <sup>1</sup>H NMR spectrum of **3b** (400 MHz, CDCl<sub>3</sub>)

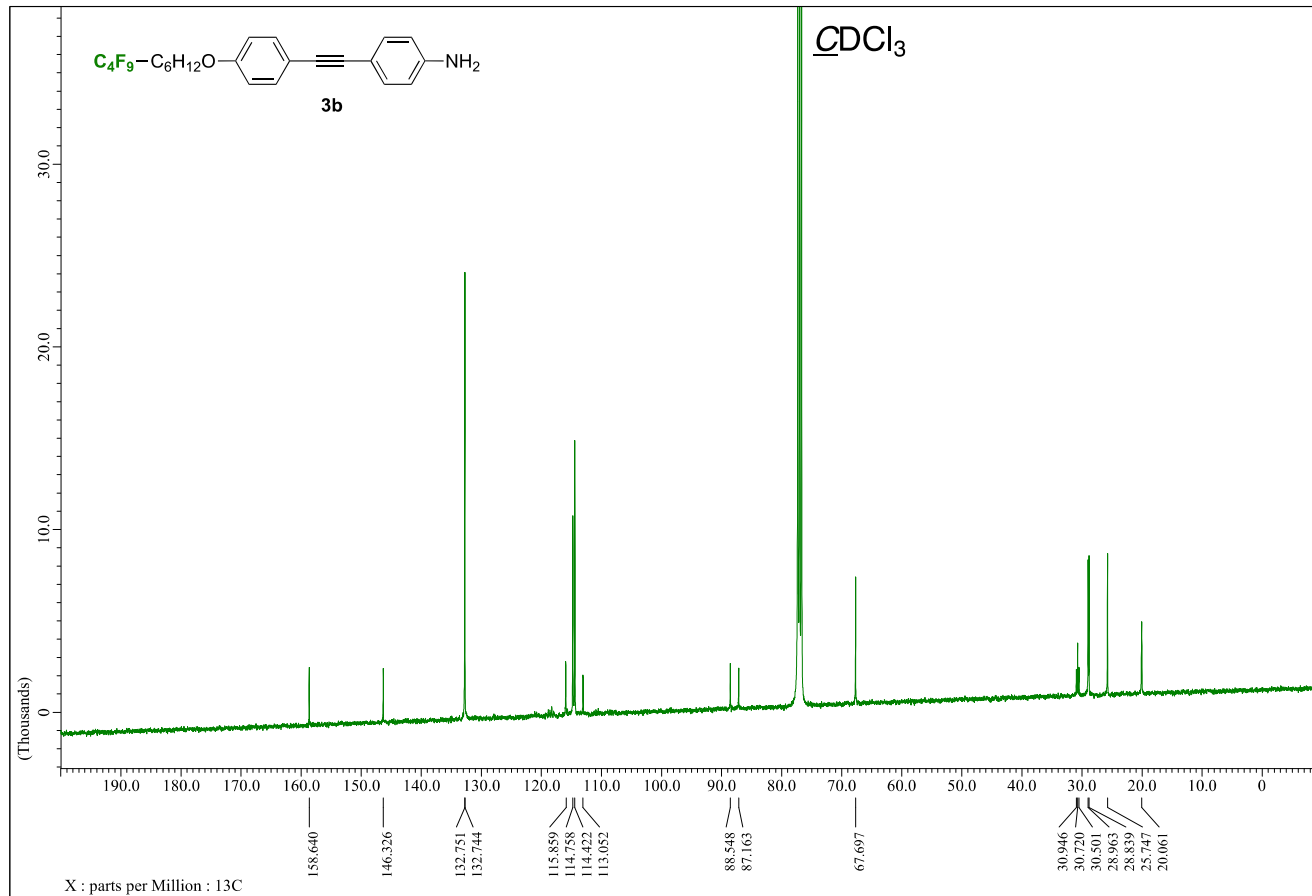

**Figure S4.** <sup>13</sup>C NMR spectrum of **3b** (100 MHz, CDCl<sub>3</sub>)

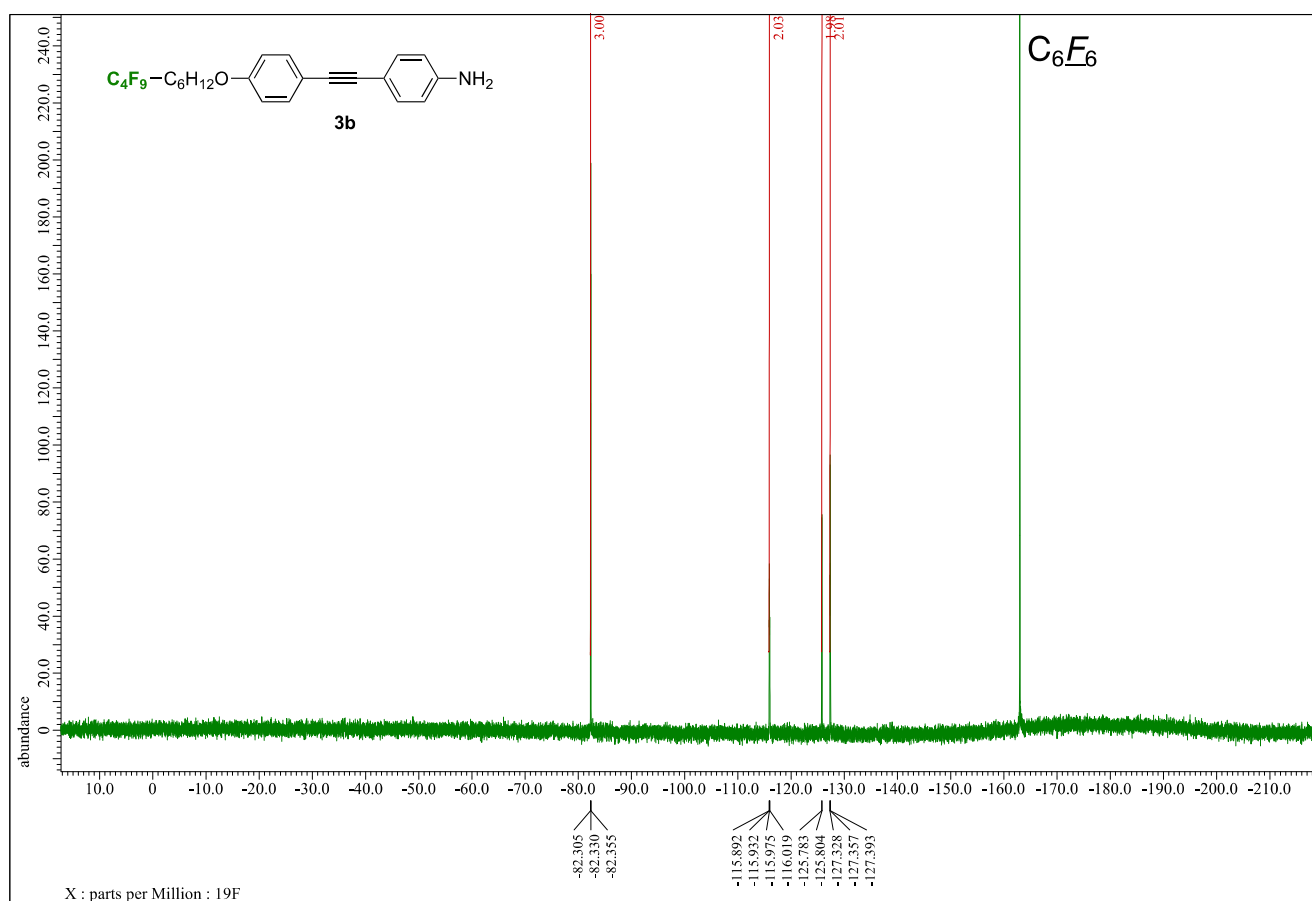

**Figure S5.** <sup>19</sup>F NMR spectrum of **3b** (376 MHz, CDCl<sub>3</sub>, C<sub>6</sub>F<sub>6</sub>)

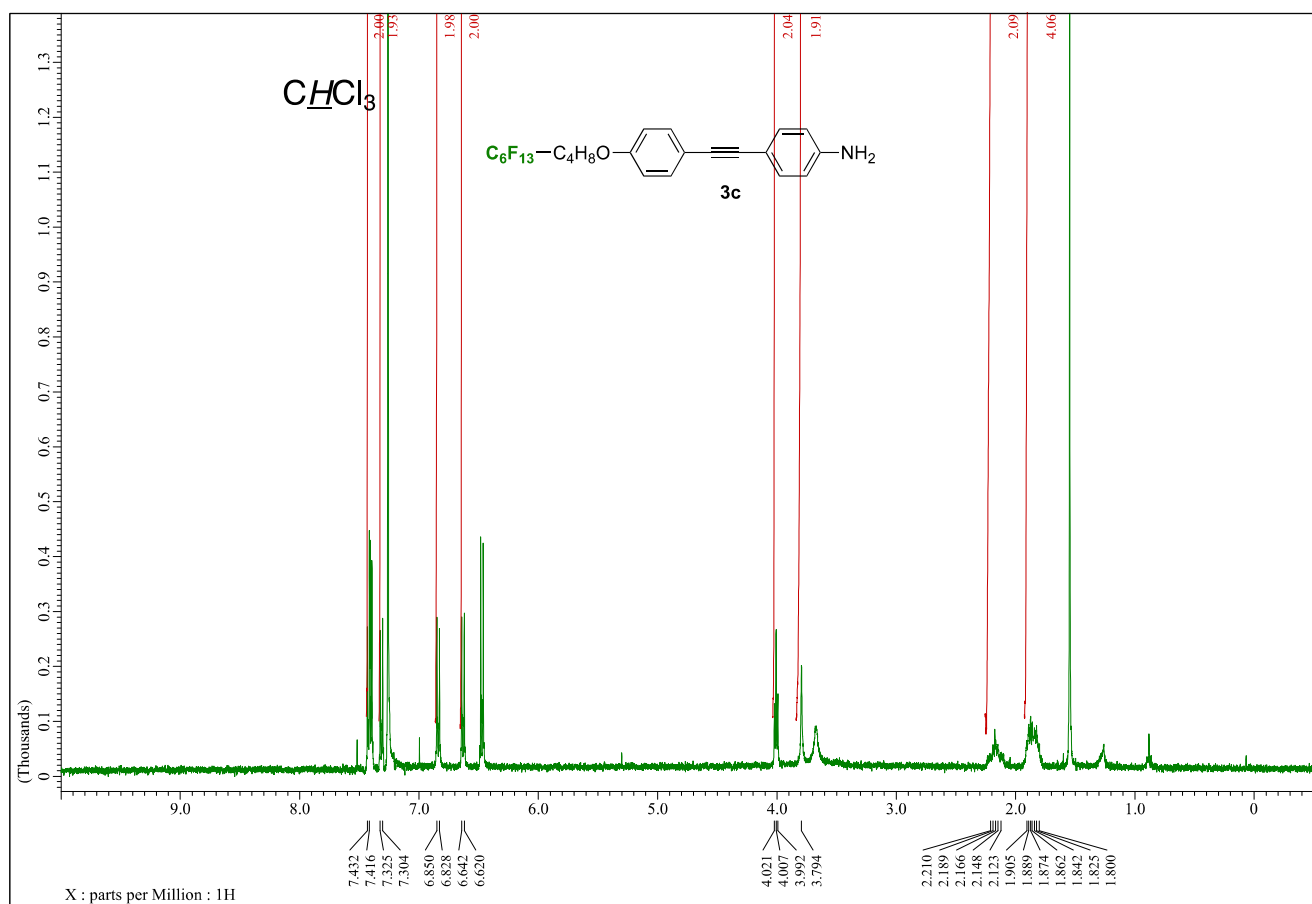

**Figure S6.** <sup>1</sup>H NMR spectrum of **3c** (400 MHz, CDCl<sub>3</sub>)

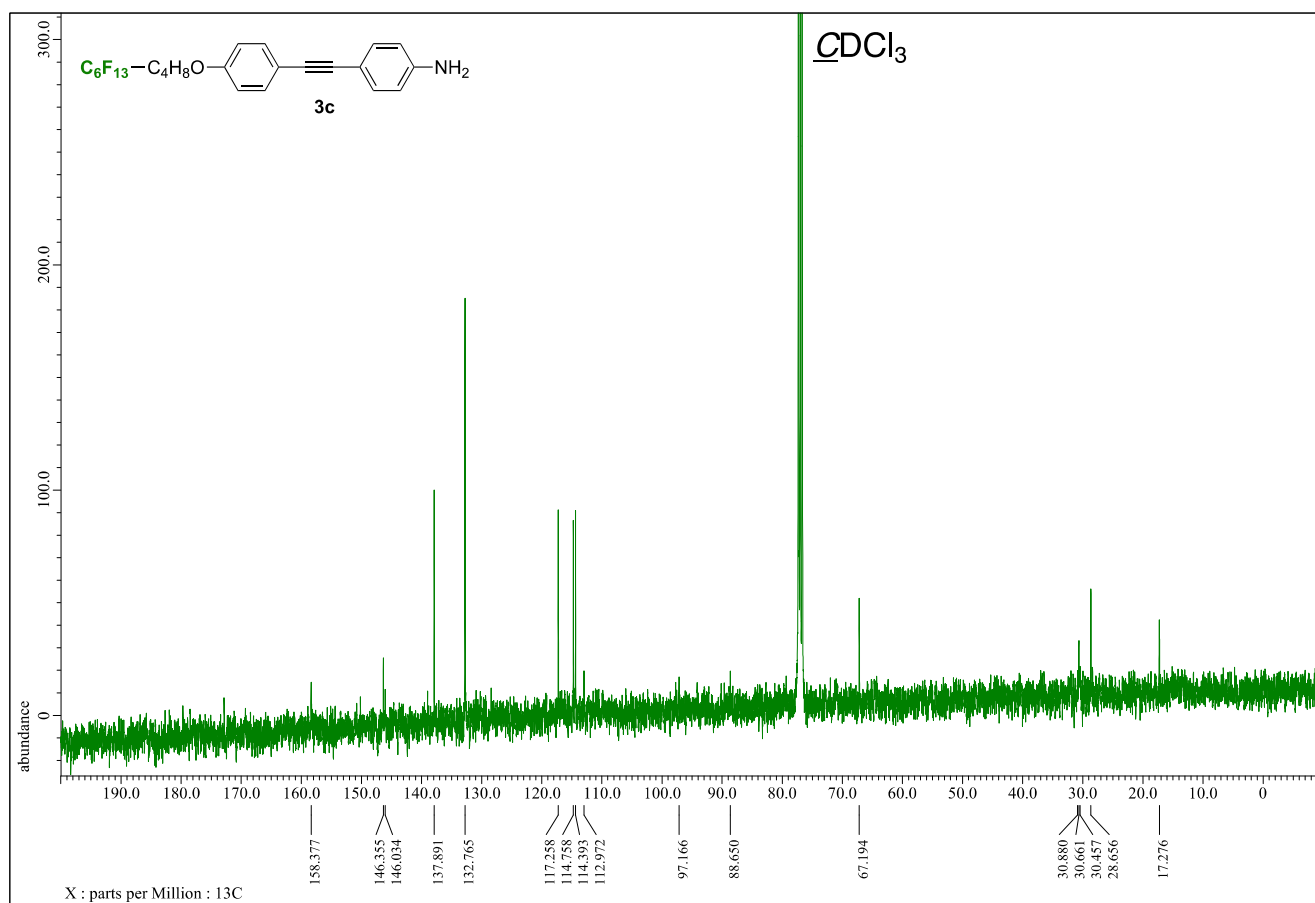

**Figure S7.**  $^{13}\text{C}$  NMR spectrum of **3c** (100 MHz,  $\text{CDCl}_3$ )

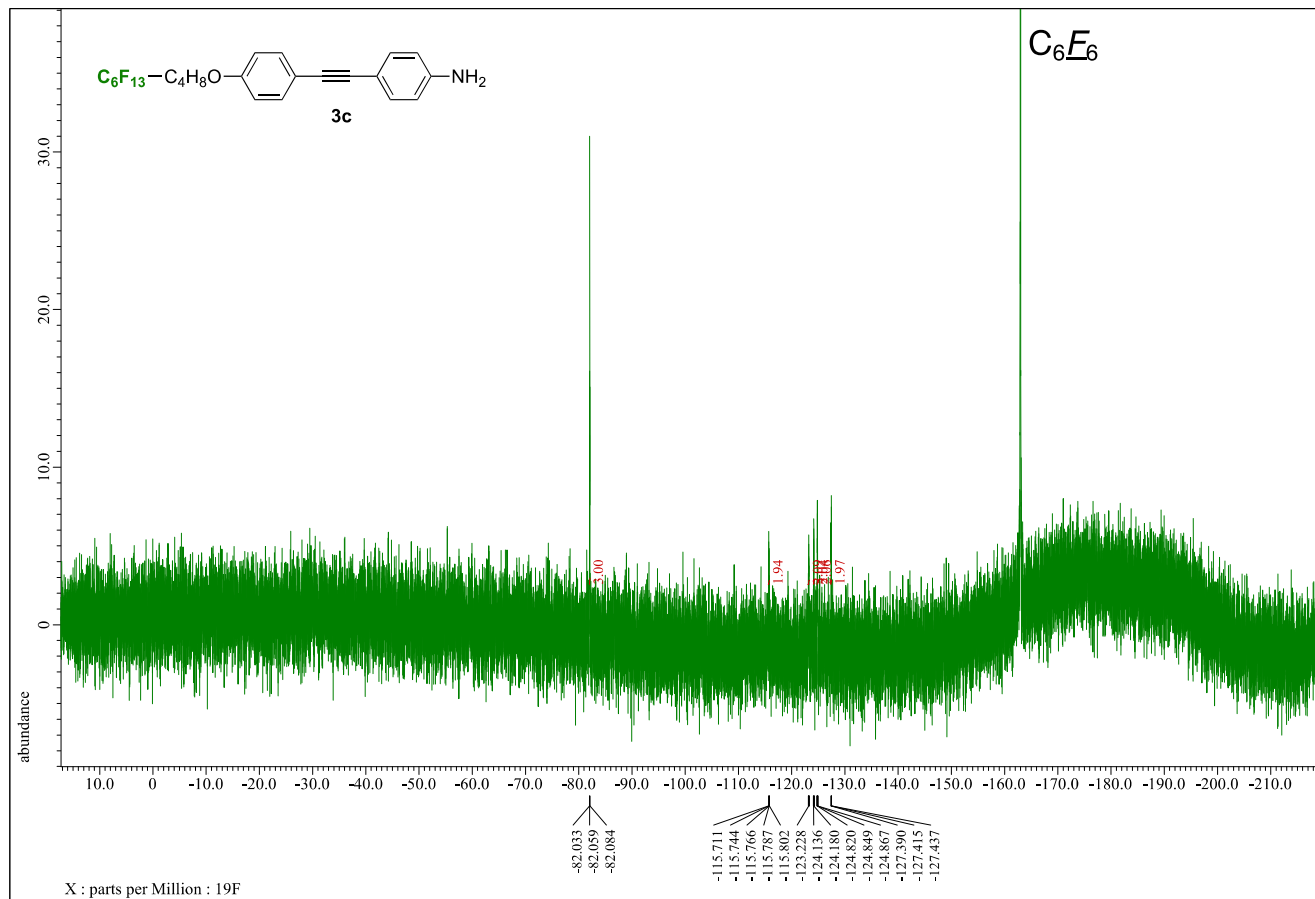

**Figure S8.**  $^{19}\text{F}$  NMR spectrum of **3c** (376 MHz,  $\text{CDCl}_3$ ,  $\text{C}_6\text{F}_6$ )

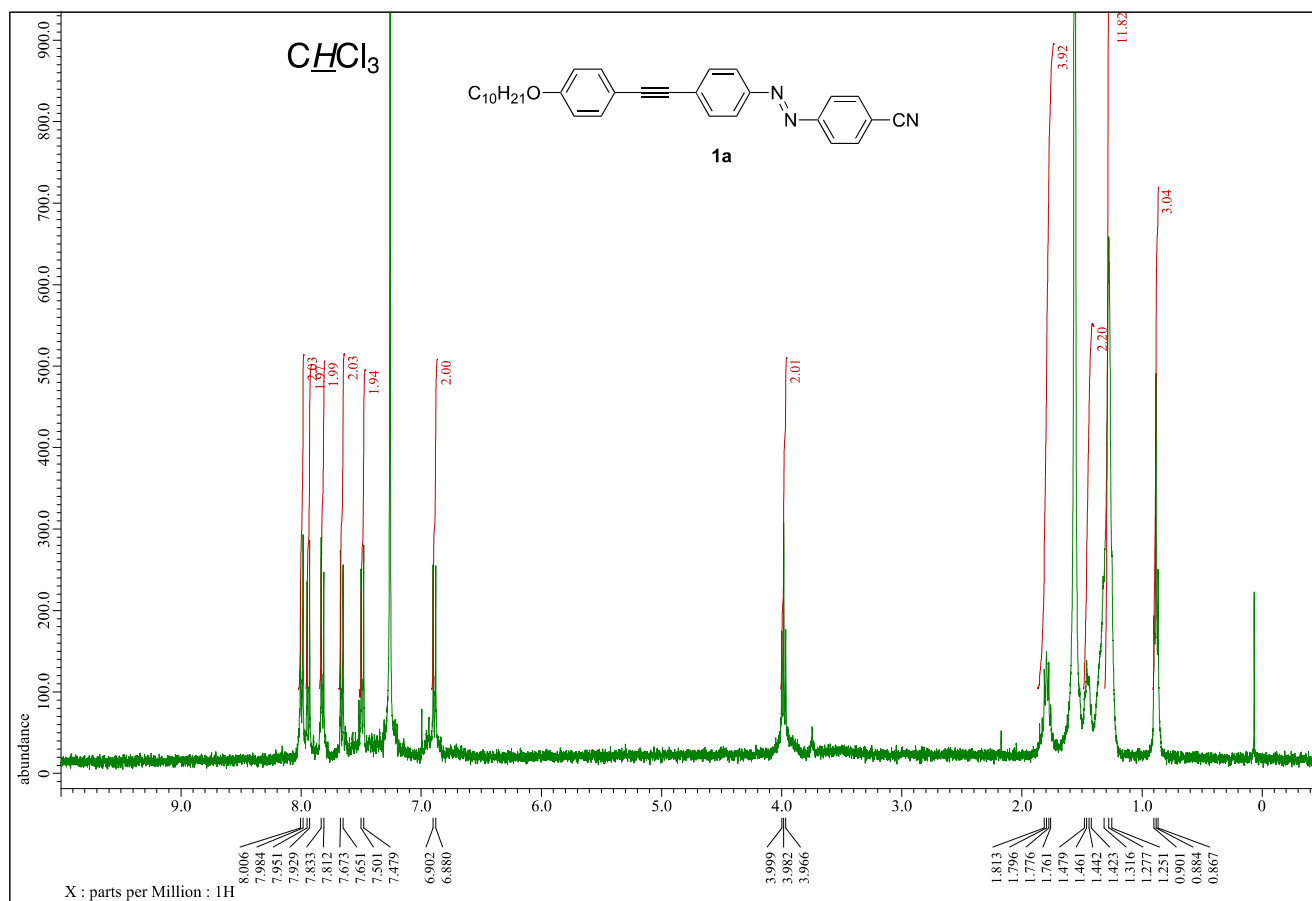

**Figure S9.** <sup>1</sup>H NMR spectrum of **1a** (400 MHz, CDCl<sub>3</sub>)

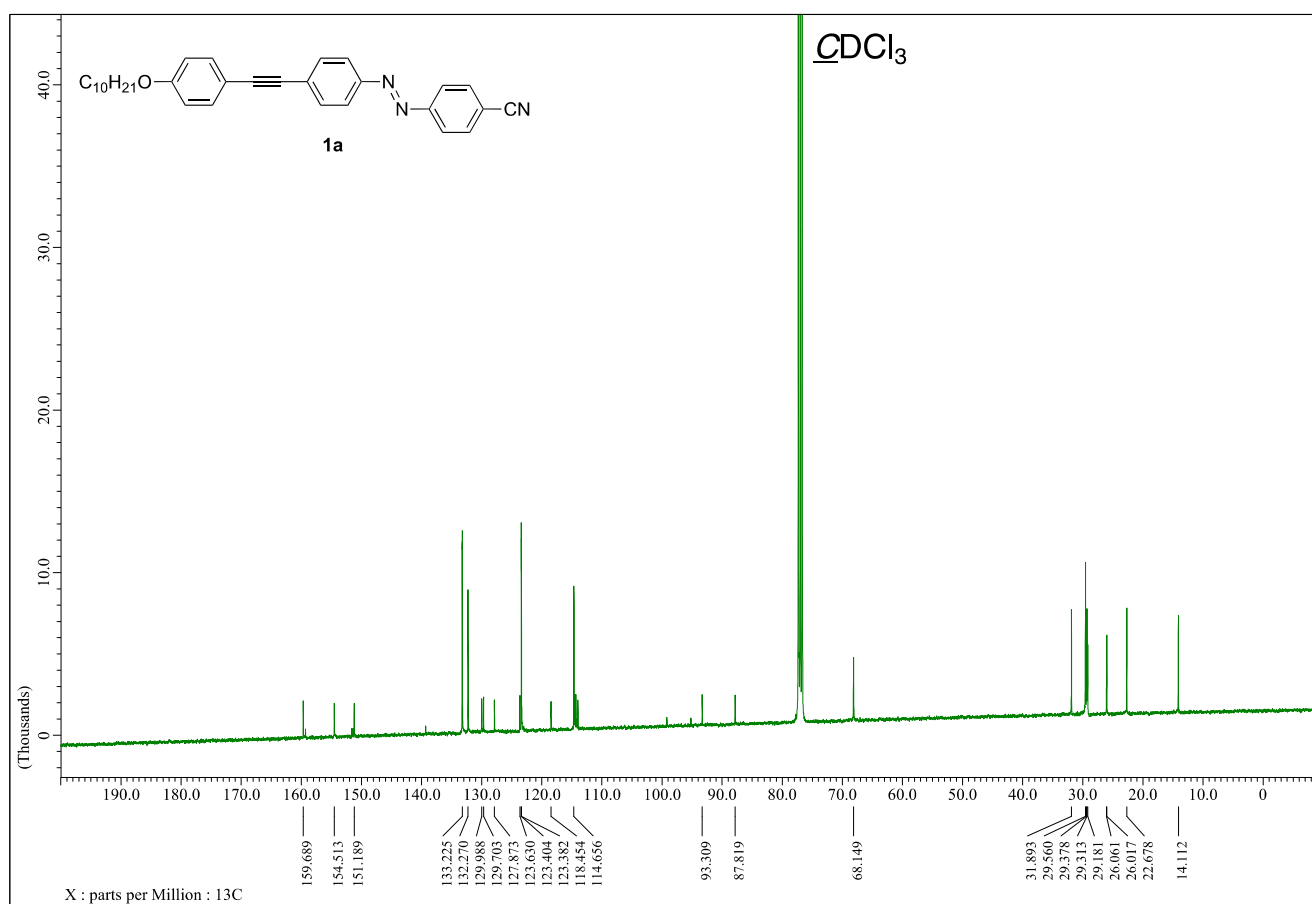

**Figure S10.** <sup>13</sup>C NMR spectrum of **1a** (100 MHz, CDCl<sub>3</sub>)



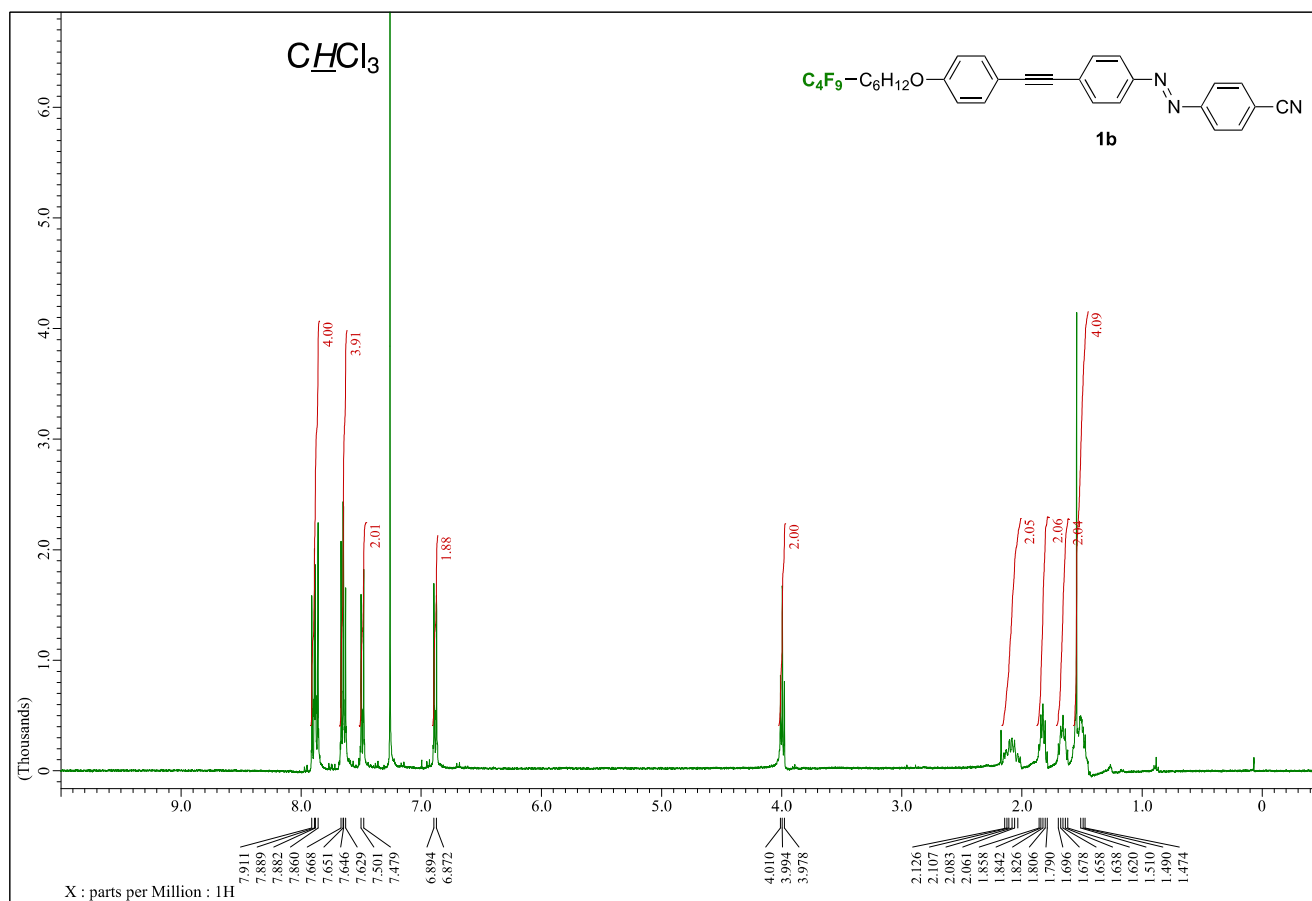

**Figure S11.** <sup>1</sup>H NMR spectrum of **1b** (400 MHz, CDCl<sub>3</sub>)

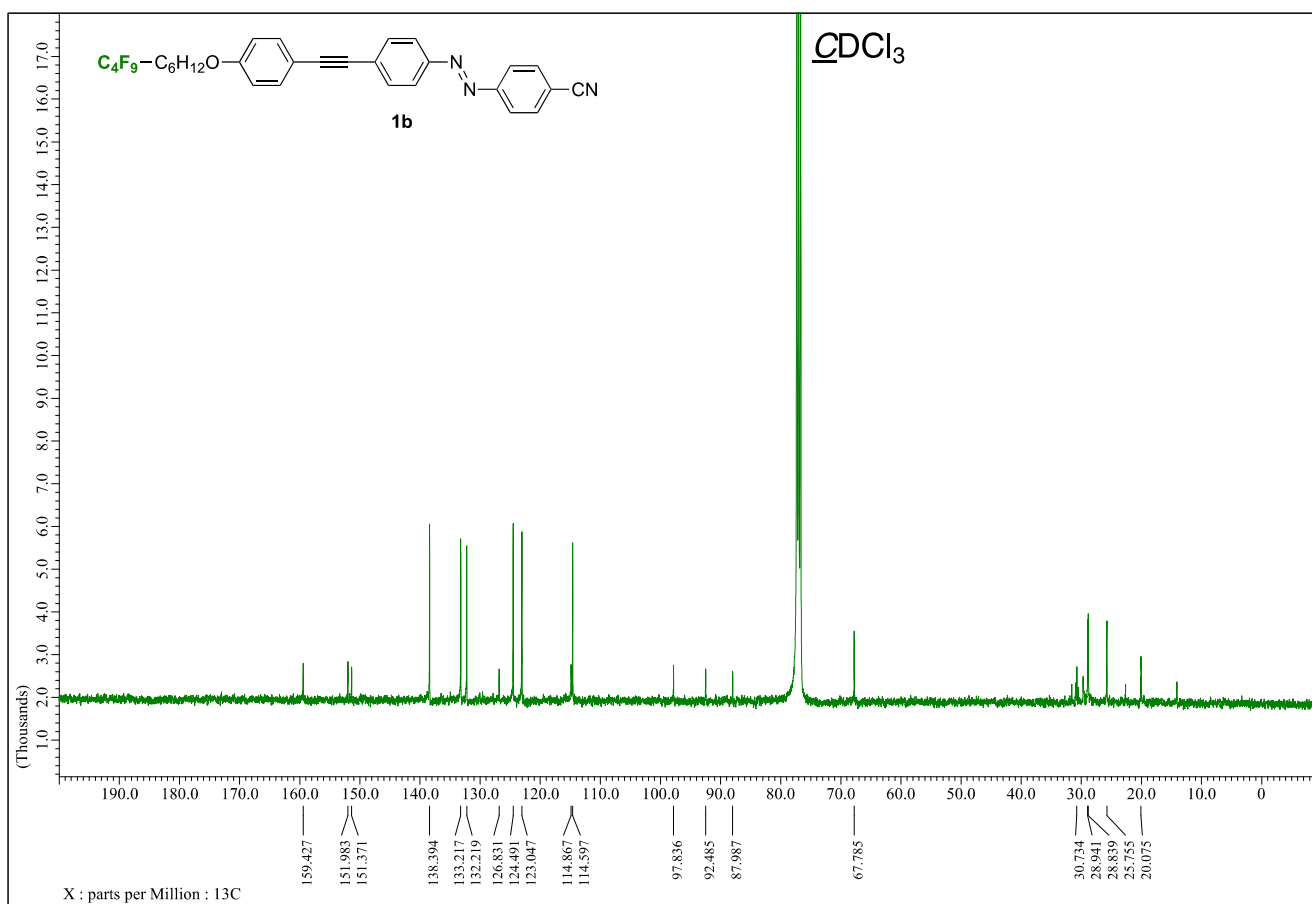

**Figure S12.** <sup>13</sup>C NMR spectrum of **1b** (100 MHz, CDCl<sub>3</sub>)

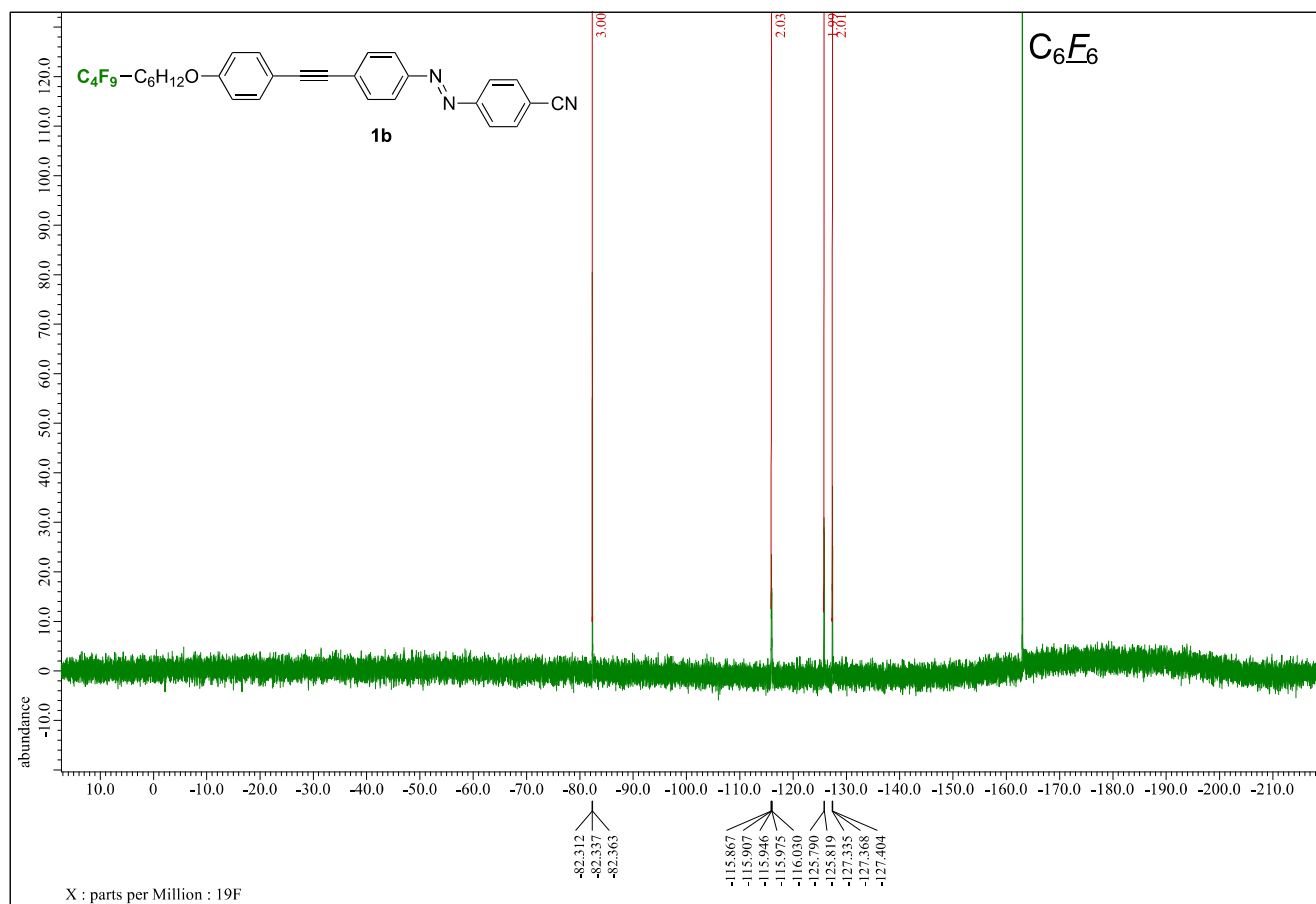

**Figure S13.**  $^{19}F$  NMR spectrum of **1b** (376 MHz,  $CDCl_3$ ,  $C_6F_6$ )

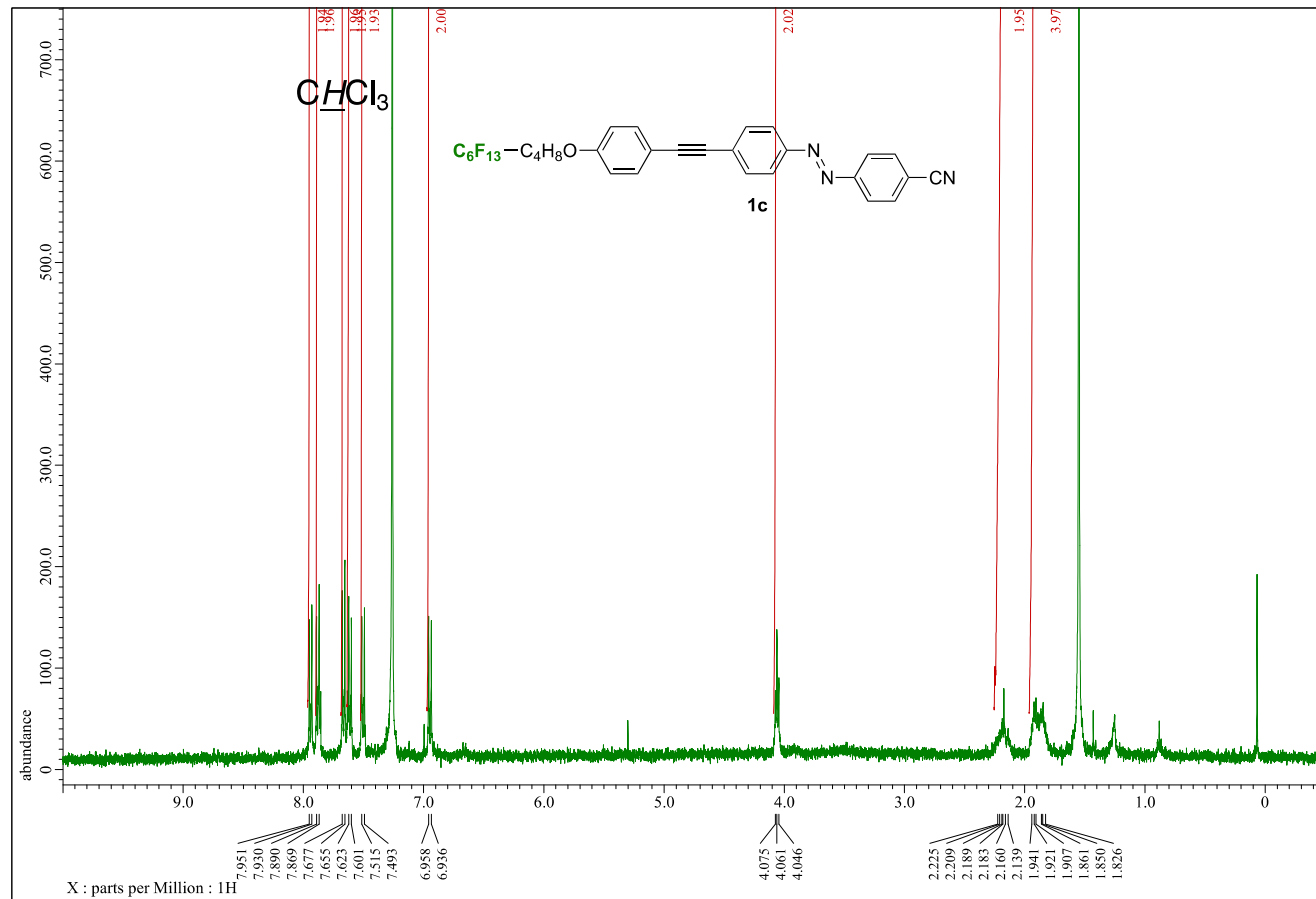

**Figure S14.**  $^1H$  NMR spectrum of **1c** (400 MHz,  $CDCl_3$ )

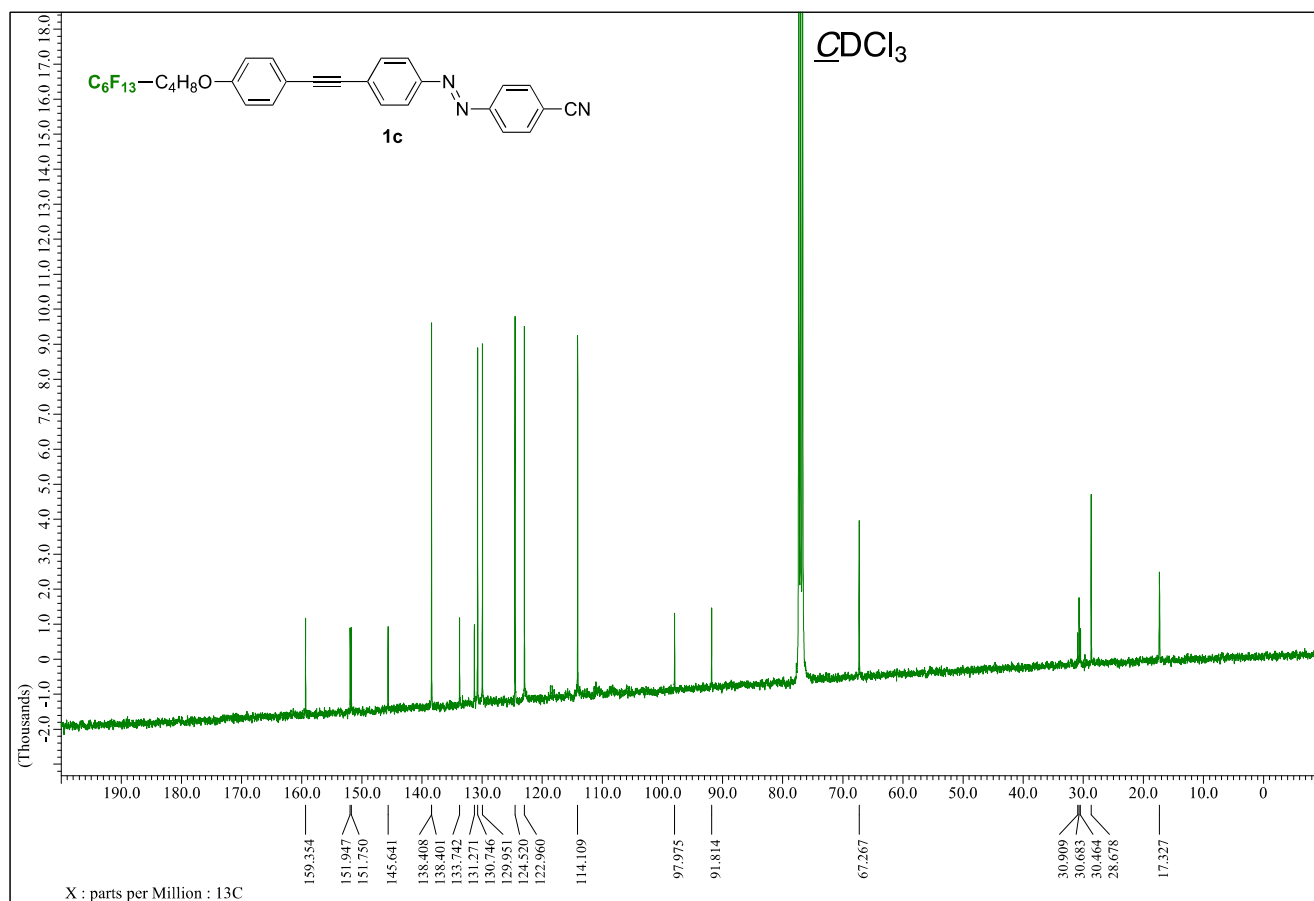

Figure S15.  $^{13}\text{C}$  NMR spectrum of **1c** (100 MHz,  $\text{CDCl}_3$ )

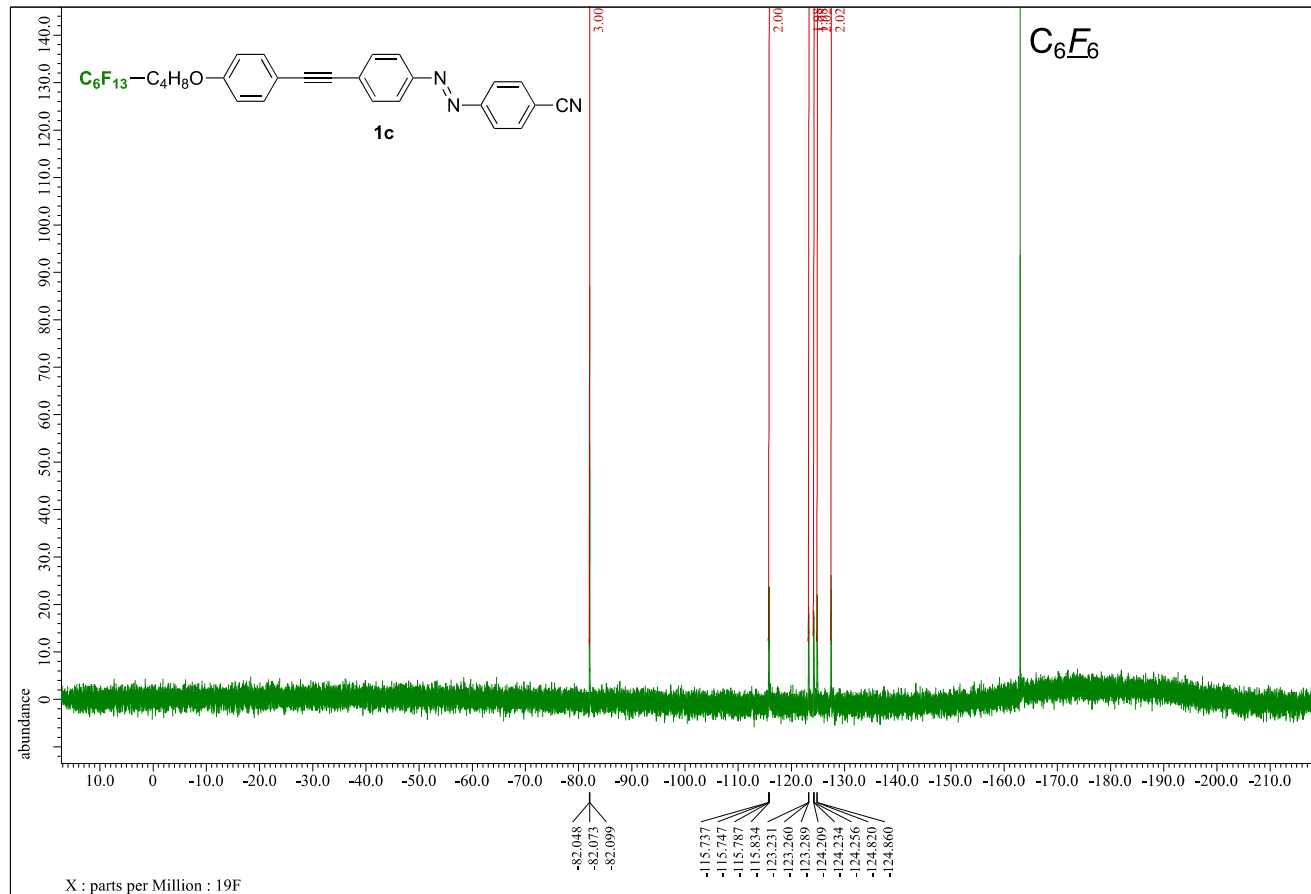

Figure S16.  $^{19}\text{F}$  NMR spectrum of **1c** (376 MHz,  $\text{CDCl}_3$ ,  $\text{C}_6\text{F}_6$ )

## Phase transition behavior

The phase transition behaviors were observed via polarizing optical microscopy (POM) using a BX53 microscope (Olympus, Tokyo, Japan) equipped with a heating and cooling stage (10.002 L, Linkam Scientific Instruments, Redhill, UK). The phase sequences and transition enthalpies were determined using DSC (Shimadzu DSC-60 Plus) at heating and cooling rates of  $5.0\text{ }^{\circ}\text{C min}^{-1}$  under an  $\text{N}_2$  atmosphere.

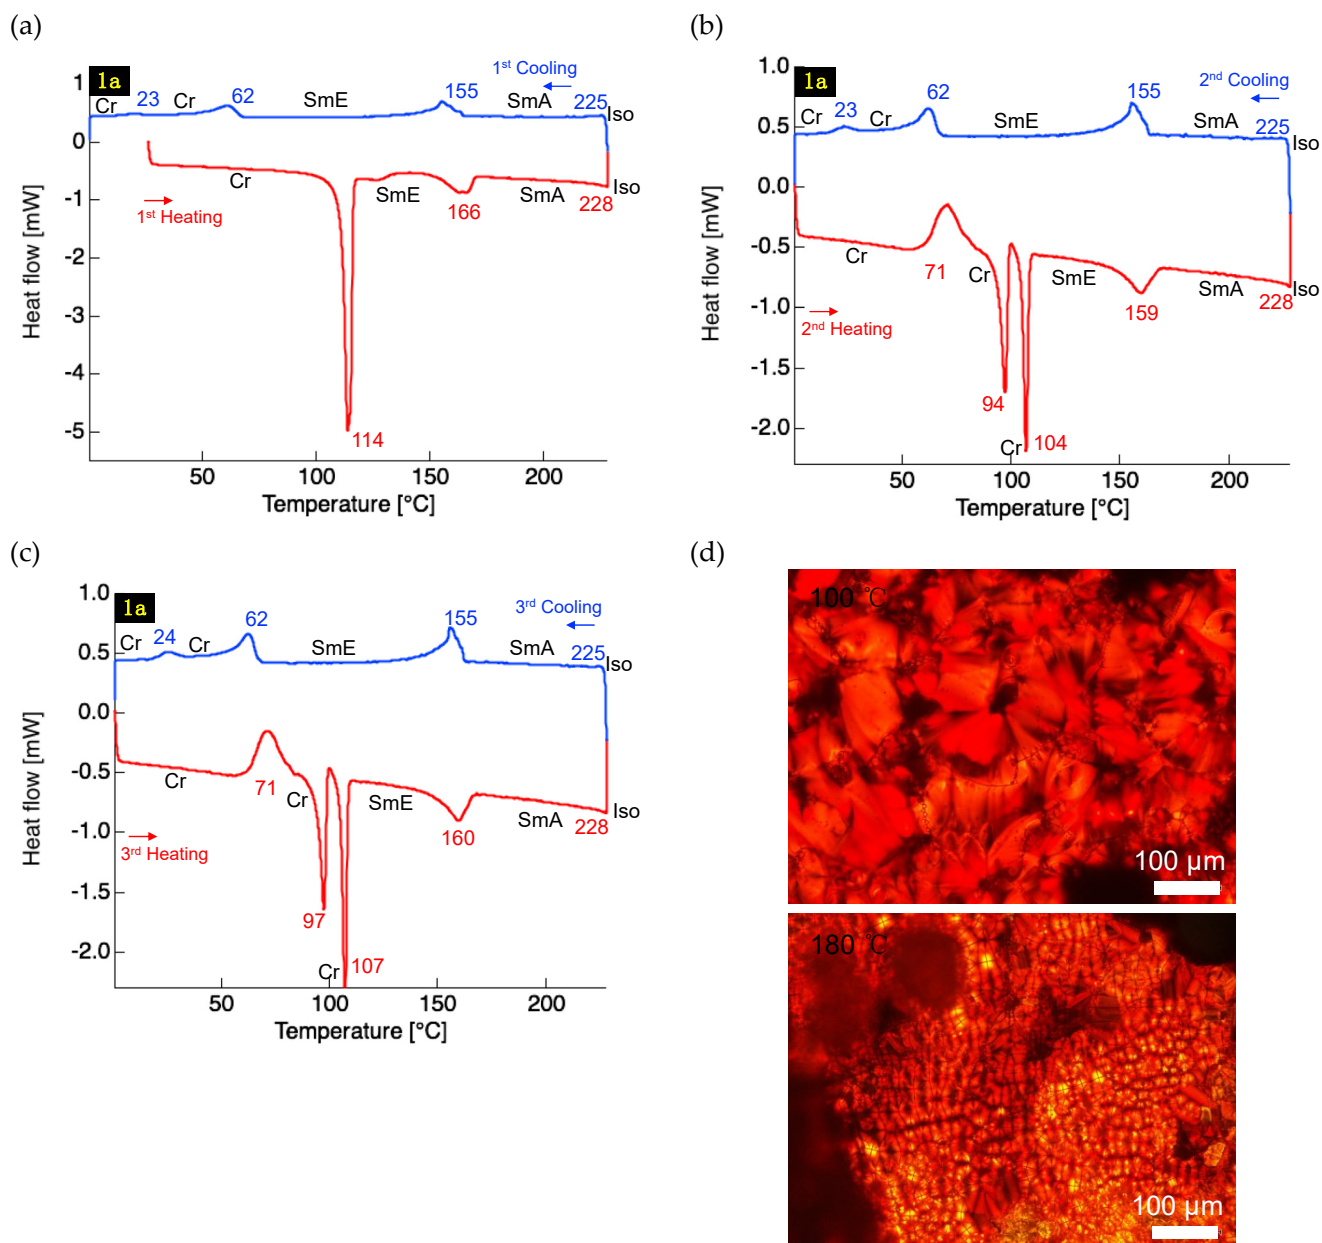

**Figure S17.** DSC thermograms of **1a** on (a) the 1st heating and cooling cycle, (b) the 2nd cycle and (c) 3rd cycle. (d) POM texture image of **1a** in the mesophase during the cooling process.

**Table S1.** Phase transition data of **1a**.

| Process     | Phase transition <sup>1</sup> | Temperature [°C] <sup>2</sup> | DH [kJ mol <sup>-1</sup> ] <sup>2</sup> | DS [J mol <sup>-1</sup> K <sup>-1</sup> ] <sup>2</sup> |
|-------------|-------------------------------|-------------------------------|-----------------------------------------|--------------------------------------------------------|
| 1st Heating | Cr-SmE                        | 114                           | 33.70                                   | 87.08                                                  |
|             | SmE-SmA                       | 166                           | 6.32                                    | 14.41                                                  |
|             | SmA-Iso                       | 228 <sup>1</sup>              | –                                       | –                                                      |
| 1st Cooling | Iso-SmA                       | 225 <sup>1</sup>              | –                                       | –                                                      |
|             | SmA-SmE                       | 155                           | –5.87                                   | –13.71                                                 |
|             | SmE-Cr                        | 62                            | –4.89                                   | –14.61                                                 |
|             | Cr-Cr                         | 20                            | –0.56                                   | –1.93                                                  |
| 2nd Heating | Cr-Cr                         | 71                            | –9.46                                   | –27.50                                                 |
|             | Cr-Cr                         | 97                            | 9.11                                    | 24.61                                                  |
|             | Cr-SmE                        | 107                           | 8.08                                    | 21.26                                                  |
|             | SmE-SmA                       | 160                           | 4.87                                    | 11.25                                                  |
|             | SmA-Iso                       | 228 <sup>1</sup>              | –                                       | –                                                      |
| 2nd Cooling | Iso-SmA                       | 225 <sup>1</sup>              | –                                       | –                                                      |
|             | SmA-SmE                       | 155                           | –6.25                                   | –14.60                                                 |
|             | SmE-Cr                        | 62                            | –4.18                                   | –12.48                                                 |
|             | Cr-Cr                         | 23                            | –0.64                                   | –2.16                                                  |
| 3rd Heating | Cr-Cr                         | 71                            | –8.39                                   | –24.37                                                 |
|             | Cr-Cr                         | 97                            | 8.42                                    | 22.73                                                  |
|             | Cr-SmE                        | 107                           | 8.74                                    | 22.99                                                  |
|             | SmE-SmA                       | 160                           | 5.40                                    | 12.46                                                  |
|             | SmA-Iso                       | 228 <sup>1</sup>              | –                                       | –                                                      |
| 2nd Cooling | Iso-SmA                       | 224 <sup>1</sup>              | –                                       | –                                                      |
|             | SmA-SmE                       | 155                           | –6.21                                   | –14.48                                                 |
|             | SmE-Cr                        | 62                            | –4.49                                   | –13.37                                                 |
|             | Cr-Cr                         | 24                            | –0.73                                   | –2.46                                                  |

<sup>1</sup> Determined by POM. <sup>2</sup> Determined by DSC.

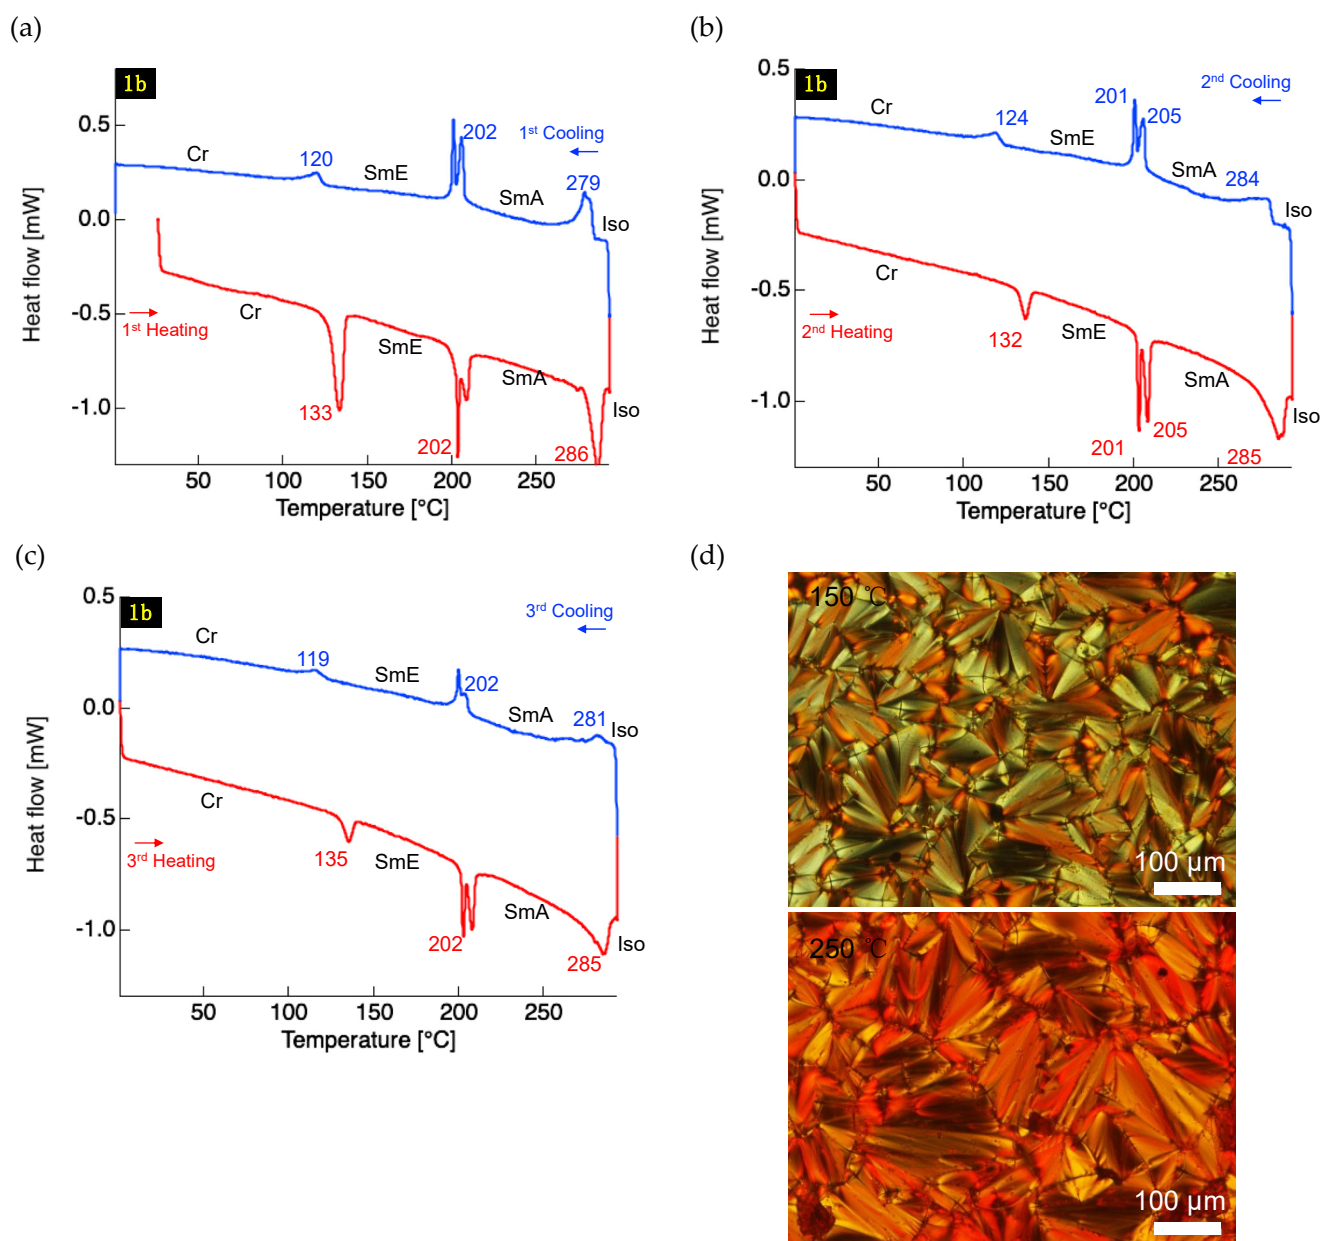

**Figure S18.** DSC thermograms of **1b** on (a) the 1st heating and cooling cycle, (b) the 2nd cycle and (c) 3rd cycle. (d) POM texture image of **1b** in the mesophase during the cooling process.

**Table S2.** Phase transition data of **1b**.

| Process     | Phase transition <sup>1</sup> | Temperature [°C] <sup>2</sup> | DH [kJ mol <sup>-1</sup> ] <sup>2</sup> | DS [J mol <sup>-1</sup> K <sup>-1</sup> ] <sup>2</sup> |
|-------------|-------------------------------|-------------------------------|-----------------------------------------|--------------------------------------------------------|
| 1st Heating | Cr-SmE                        | 133                           | 11.70                                   | 28.78                                                  |
|             | SmE-SmA                       | 202                           | 7.71                                    | 16.20                                                  |
|             | SmA-Iso                       | 286                           | 8.99                                    | 16.06                                                  |
| 1st Cooling | Iso-SmA                       | 279                           | -7.96                                   | -14.43                                                 |
|             | SmA-SmE                       | 202                           | -6.76                                   | -14.23                                                 |
|             | SmE-Cr                        | 120                           | -2.13                                   | -5.42                                                  |
| 2nd Heating | Cr-SmE                        | 136                           | 2.18                                    | 5.32                                                   |
|             | SmE-SmA                       | 202                           | 6.64                                    | 13.99                                                  |
|             | SmA-Iso                       | 286                           | 7.23                                    | 12.95                                                  |
| 2nd Cooling | Iso-SmA                       | 281                           | -4.97                                   | -8.96                                                  |
|             | SmA-SmE                       | 202                           | -5.28                                   | -11.12                                                 |
|             | SmE-Cr                        | 119                           | -1.86                                   | -4.69                                                  |
| 3rd Heating | Cr-SmE                        | 135                           | 1.84                                    | 4.50                                                   |
|             | SmE-SmA                       | 202                           | 5.89                                    | 12.40                                                  |
|             | SmA-Iso                       | 285                           | 5.71                                    | 10.23                                                  |
| 3rd Cooling | Iso-SmA                       | 281                           | -0.48                                   | -0.86                                                  |
|             | SmA-SmE                       | 202                           | -2.89                                   | -6.09                                                  |
|             | SmE-Cr                        | 119                           | -1.14                                   | -2.92                                                  |

<sup>1</sup> Determined by POM. <sup>2</sup> Determined by DSC.

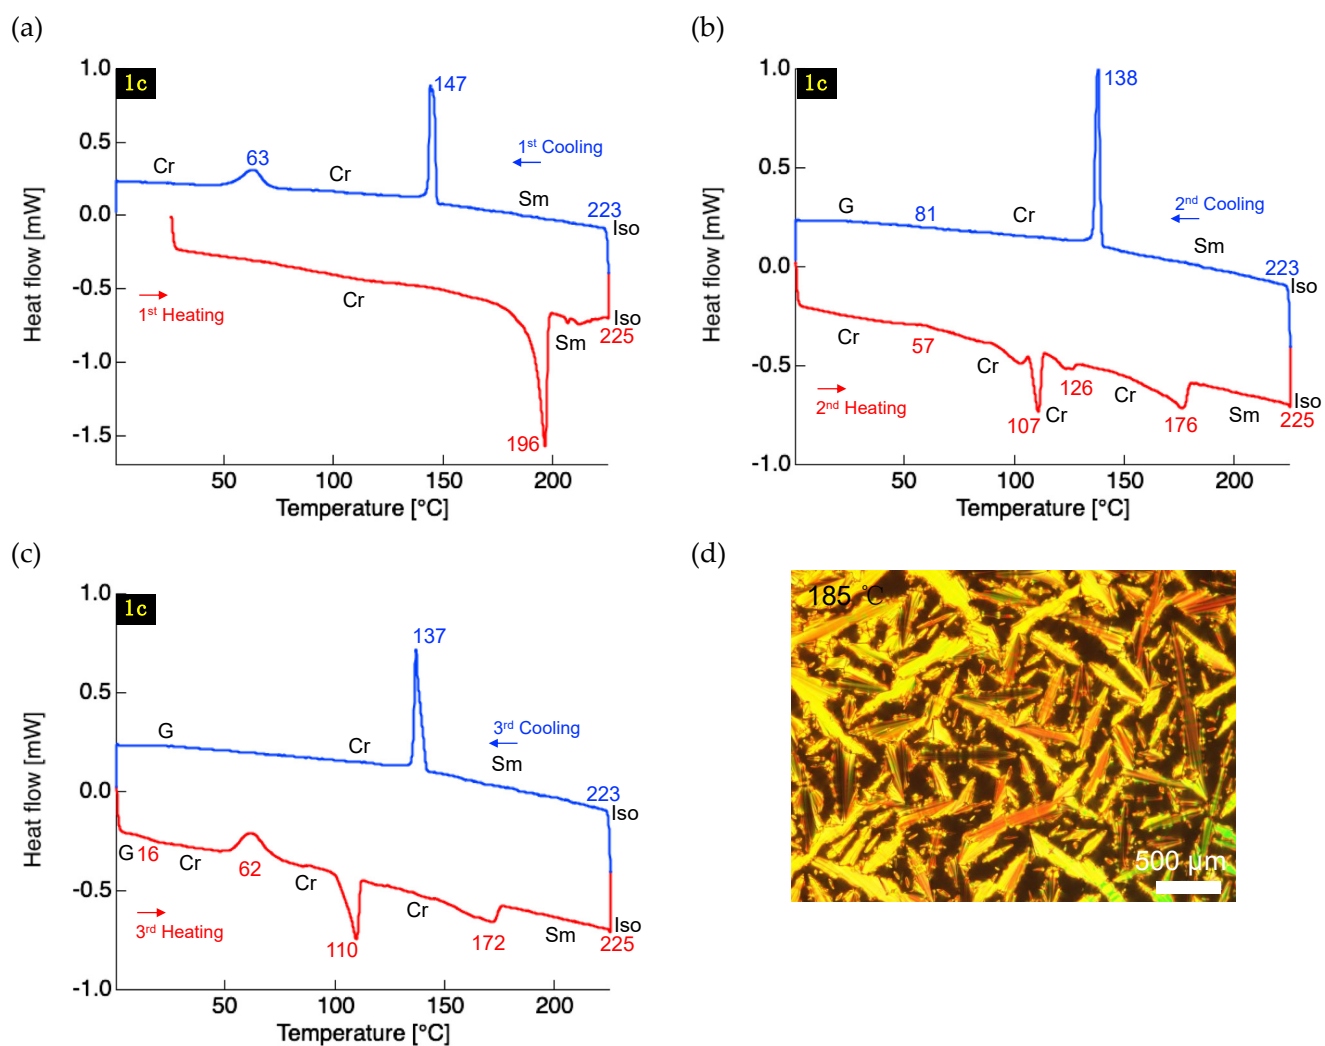

**Figure S19.** DSC thermograms of **1c** on (a) the 1st heating and cooling cycle, (b) the 2nd cycle and (c) 3rd cycle. (d) POM texture image of **1c** in the mesophase during the cooling process.



**Table S3.** Phase transition data of **1c**.

| Process     | Phase transition <sup>1</sup> | Temperature [°C] <sup>2</sup> | DH [kJ mol <sup>-1</sup> ] <sup>2</sup> | DS [J mol <sup>-1</sup> K <sup>-1</sup> ] <sup>2</sup> |
|-------------|-------------------------------|-------------------------------|-----------------------------------------|--------------------------------------------------------|
| 1st Heating | Cr-Sm                         | 196                           | 26.28                                   | 55.99                                                  |
|             | Sm-Iso                        | 225                           | – <sup>1</sup>                          | – <sup>1</sup>                                         |
| 1st Cooling | Iso-Sm                        | 223                           | – <sup>1</sup>                          | – <sup>1</sup>                                         |
|             | Sm-Cr                         | 147                           | –11.70                                  | –27.86                                                 |
|             | Cr-Cr                         | 63                            | –6.41                                   | –19.08                                                 |
| 2nd Heating | Cr-Cr                         | 57                            | –2.22                                   | –6.72                                                  |
|             | Cr-Cr                         | 107                           | 8.62                                    | 22.70                                                  |
|             | Cr-Cr                         | 126                           | 1.60                                    | 4.02                                                   |
|             | Cr-Sm                         | 176                           | 10.94                                   | 24.36                                                  |
|             | Sm-Iso                        | 225                           | – <sup>1</sup>                          | – <sup>1</sup>                                         |
| 2nd Cooling | Iso-Sm                        | 223                           | – <sup>1</sup>                          | – <sup>1</sup>                                         |
|             | Sm-Iso                        | 138                           | –10.32                                  | –25.11                                                 |
|             | Iso-G                         | 81                            | – <sup>1</sup>                          | – <sup>1</sup>                                         |
| 3rd Heating | G-Cr                          | 16                            | – <sup>1</sup>                          | – <sup>1</sup>                                         |
|             | Cr-Cr                         | 62                            | –6.84                                   | –20.44                                                 |
|             | Cr-Cr                         | 110                           | 8.50                                    | 22.21                                                  |
|             | Cr-Sm                         | 172                           | 6.70                                    | 15.06                                                  |
|             | Sm-Iso                        | 225                           | – <sup>1</sup>                          | – <sup>1</sup>                                         |
| 3rd Cooling | Iso-Sm                        | 223                           | – <sup>1</sup>                          | – <sup>1</sup>                                         |
|             | Sm-Cr                         | 137                           | –9.29                                   | –22.66                                                 |
|             | Cr-G                          | –                             | – <sup>1</sup>                          | – <sup>1</sup>                                         |

<sup>1</sup> Determined by POM. <sup>2</sup> Determined by DSC.

## Powder X-ray diffraction

The LC structures were evaluated using an FR-E X-ray diffractometer equipped with an R-axis IV 2D detector (Rigaku), and 0.3 mm collimated Cu K $\alpha$  radiation ( $\lambda = 1.54187 \text{ \AA}$ ) was used as an X-ray beam, with the camera length set at 300 mm. The sample powder was loaded into a thin-walled glass capillary tube ( $f$  1.0–2.5 mm) for use in X-ray diffraction (XRD) and annealed up to its isotropic temperature under vacuum. The glass capillary was set on a ceramic heater attached to the FR-E sample holder, and the exposure time of the X-ray beam was 5 min.

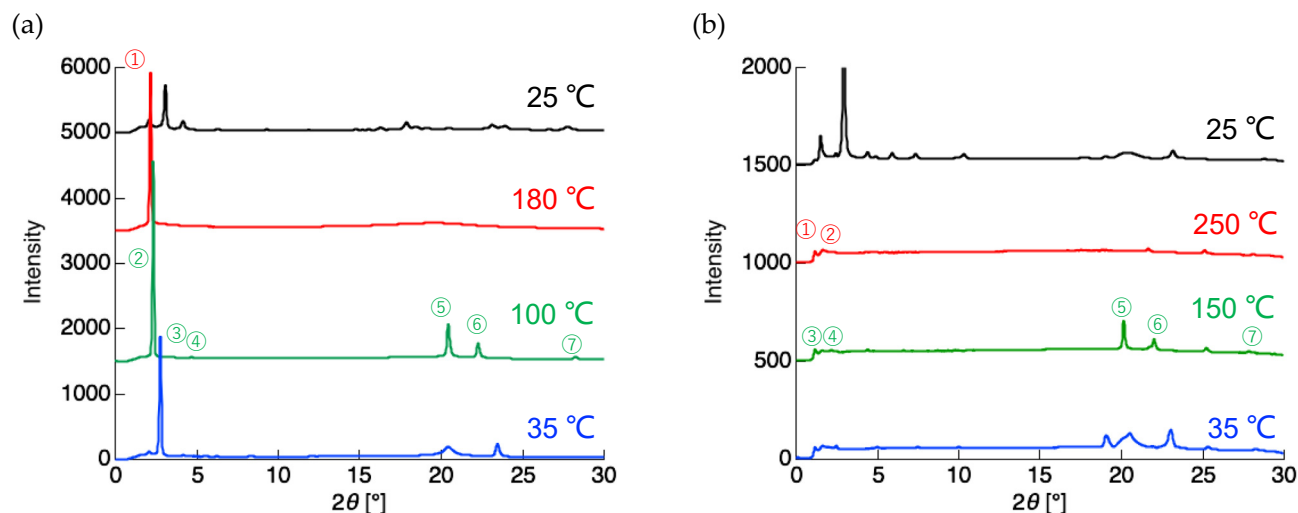

**Figure S20.** PXRD patterns of (a) **1a** at 25 °C (Cr), 180 °C (SmA), 100 °C (SmE), and 35 °C (Cr), and (b) **1b** at 25 °C (Cr), 250 °C (SmA), 150 °C (SmE), and 35 °C (Cr).

**Table S4.** X-ray diffraction data of **1a** (180 °C and 100 °C) and **1b** (250 °C and 150 °C)

| <b>1a</b> |               |       |                  | <b>1b</b> |               |       |                  |
|-----------|---------------|-------|------------------|-----------|---------------|-------|------------------|
| label     | 2 $\theta$ /° | d /nm | <i>hkl</i> index | label     | 2 $\theta$ /° | d /nm | <i>hkl</i> index |
| 1         | 2.17          | 4.07  | 001              | 1         | 2.22          | 3.97  | 001              |
| 2         | 2.34          | 3.77  | 001              | 2         | 4.38          | 2.01  | 002              |
| 3         | 4.68          | 1.89  | 002              | 3         | 2.18          | 4.05  | 001              |
| 4         | 7.04          | 1.25  | 003              | 4         | 4.42          | 2.00  | 002              |
| 5         | 20.44         | 0.43  | 110              | 5         | 20.14         | 0.44  | 110              |
| 6         | 22.28         | 0.40  | 200              | 6         | 22.00         | 0.40  | 200              |
| 7         | 28.23         | 0.32  | 210              | 7         | 27.83         | 0.32  | 210              |

## Photophysical behavior

Ultraviolet-visible light absorption spectroscopy was performed using a V-750 absorption spectrometer (JASCO, Tokyo, Japan). For the measurement of the solution sample, the transmission method was used, and the samples were prepared by dissolving the compounds in  $\text{CH}_2\text{Cl}_2$  and adjusting the concentration to  $1.0 \times 10^{-5} \text{ mol L}^{-1}$ . For the measurement of powder samples, diffuse reflection method was used, and the samples were used pristine crystalline powder obtained by recrystallization.

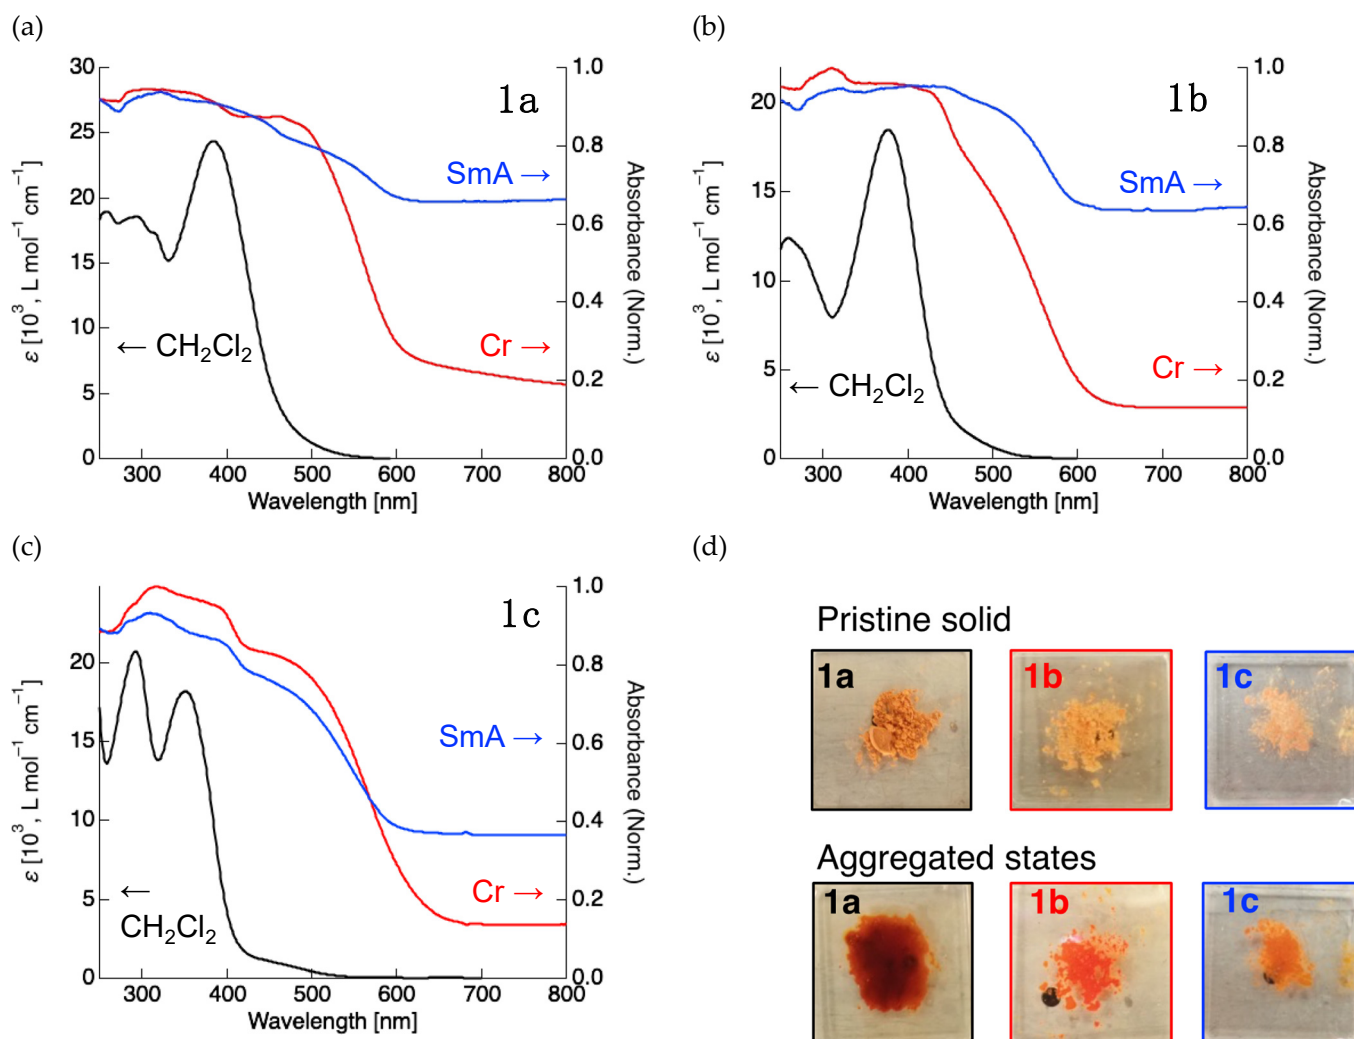

**Figure S21.** UV-vis Absorption ( $1.0 \times 10^{-5} \text{ mol L}^{-1} \text{ CH}_2\text{Cl}_2$  solution) and diffuse reflection spectra (pristine solid and aggregated states in SmA phase) of (a) **1a**, (b) **1b**, and (c) **1c**. (d) Photographs of **1a**–**c** in the pristine solid and aggregated states in SmA phase.

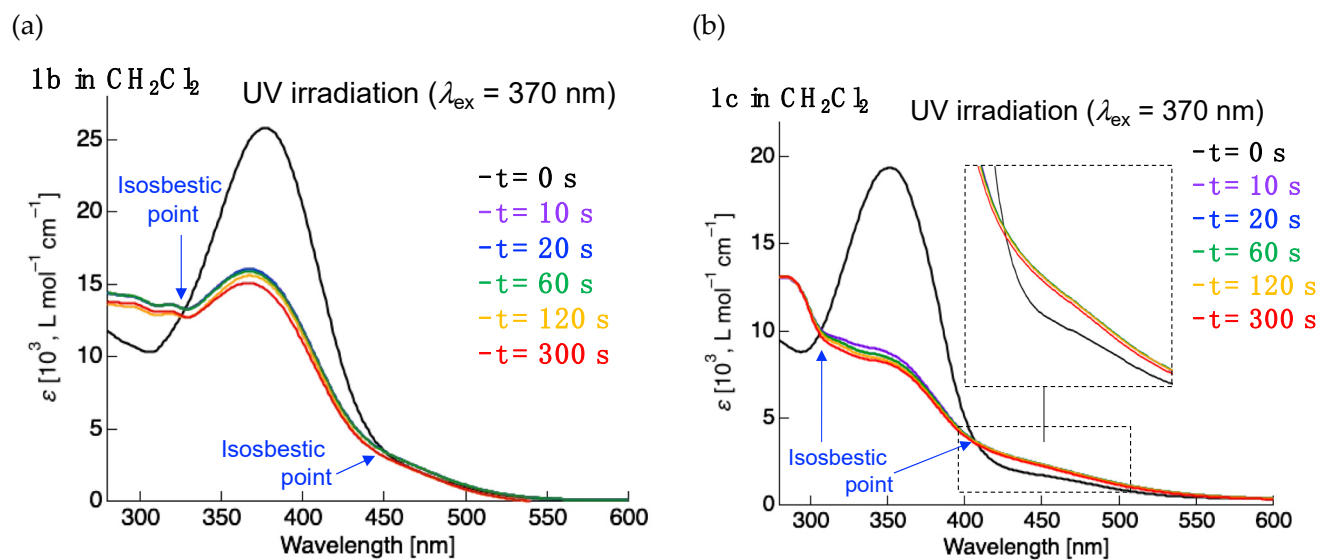

**Figure S22.** UV-vis. absorption spectral change by UV irradiation of (a) **1b** and (b) **1c** in  $\text{CH}_2\text{Cl}_2$  solution. Concentration:  $1.0 \times 10^{-5} \text{ mol L}^{-1}$ .

(a) **1a** (150 °C)

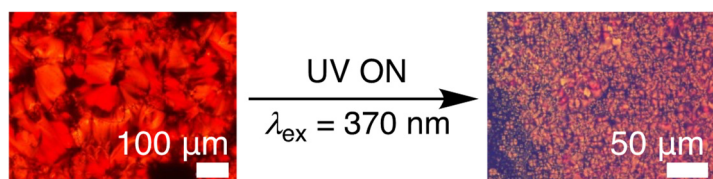

(b) **1b** (180 °C)

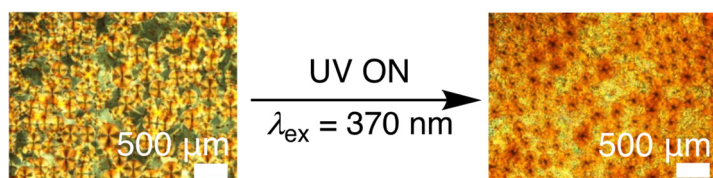

(c) **1c** (190 °C)

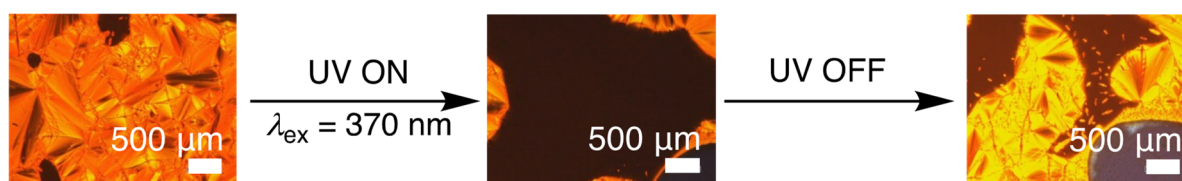

**Figure S23.** POM image change in the mesophase due to UV ( $\lambda_{\text{ex}} = 370 \text{ nm}$ ) irradiation for (a) **1a** (150 °C), (b) **1b** (180 °C), and (c) **1c** (190 °C).

## Theoretical study

Density functional theory (DFT) calculations were conducted using the Gaussian 16 (Rev. B.01) suite of programs (Gaussian, Wallingford, CT, USA), and geometry optimizations were performed at the CAM-B3LYP/6-311+G(d,p)//CAM-B3LYP/6-31+G(d) level of theory with an implicit solvation model, i.e., the conductor-like polarizable continuum model (CPCM), for CH<sub>2</sub>Cl<sub>2</sub>. Vertical electronic transitions were calculated using time-dependent DFT at the same level of theory.

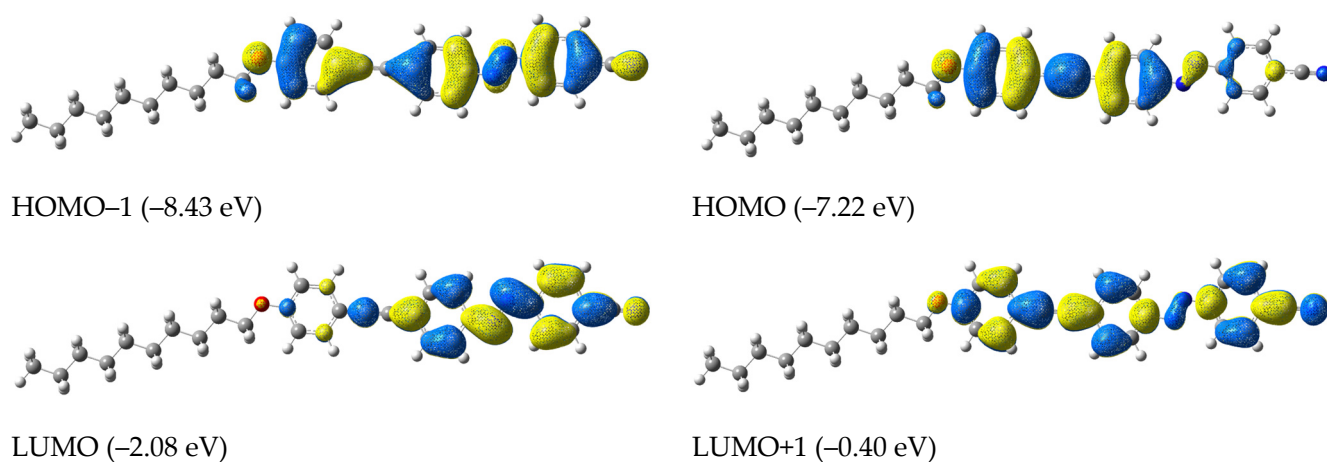

**Figure S24.** Molecular orbital distributions of HOMO-1, HOMO, LUMO, and LUMO+1 for **1a**.

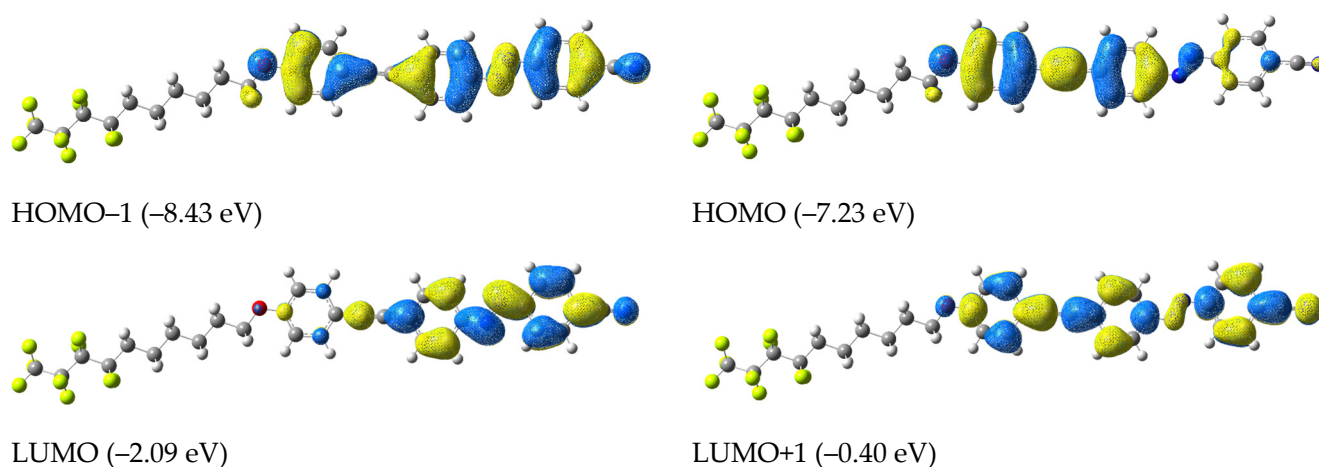

**Figure S25.** Molecular orbital distributions of HOMO-1, HOMO, LUMO, and LUMO+1 for **1b**.

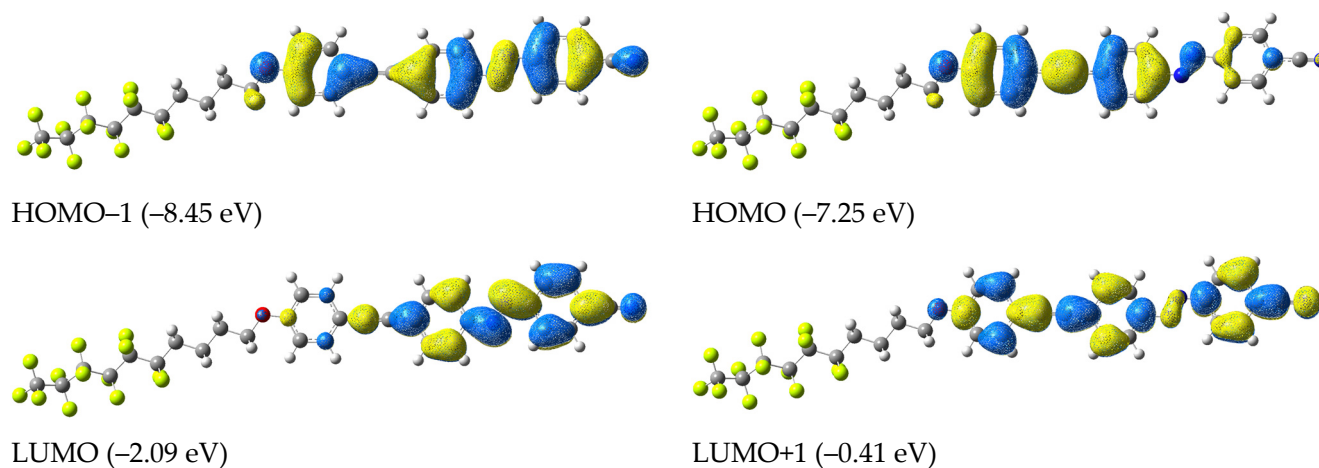

**Figure S26.** Molecular orbital distributions of HOMO-1, HOMO, LUMO, and LUMO+1 for **1c**.

**Table S5.** Theoretical electronic transition calculated by TD-DFT method.

| Compound | $\lambda_{\text{calcd}} [\text{nm}]^2$<br>(Oscillator strength) | HOMO/LUMO [eV] <sup>2</sup><br>(DE <sup>H-L</sup> ) | Theoretical transition <sup>2</sup><br>(Contribution)          |
|----------|-----------------------------------------------------------------|-----------------------------------------------------|----------------------------------------------------------------|
| 1a       | 384 ( $f = 1.98$ )                                              | -7.22 eV/ -2.08 eV<br>(5.13 eV)                     | HOMO → LUMO (78%)<br>HOMO-1 → LUMO (14%)<br>HOMO → LUMO+1 (4%) |
| 1b       | 384 ( $f = 1.98$ )                                              | -7.23 eV/ -2.09 eV<br>(5.14 eV)                     | HOMO → LUMO (78%)<br>HOMO-1 → LUMO (14%)<br>HOMO → LUMO+1 (4%) |
| 1c       | 383 ( $f = 1.98$ )                                              | -7.25 eV/ -2.09 eV<br>(5.16 eV)                     | HOMO → LUMO (79%)<br>HOMO-1 → LUMO (14%)<br>HOMO → LUMO+1 (4%) |

**Table S6.** Cartesian coordinates of optimized geometry for **1a**.

| No. | Atom | Type | Coordinates (Angstroms) |           |           |    |   |   |            |           |           |
|-----|------|------|-------------------------|-----------|-----------|----|---|---|------------|-----------|-----------|
|     | No.  |      | x                       | y         | z         |    |   |   |            |           |           |
| 1   | 6    | 0    | 10.093453               | -0.028173 | 0.015924  | 34 | 6 | 0 | -3.009795  | 1.090218  | -0.024731 |
| 2   | 6    | 0    | 10.973177               | 1.052663  | 0.074565  | 35 | 1 | 0 | -3.156995  | -1.07035  | -0.016557 |
| 3   | 6    | 0    | 10.583954               | -1.337644 | -0.041263 | 36 | 1 | 0 | -2.543491  | 3.184578  | -0.032884 |
| 4   | 6    | 0    | 12.344003               | 0.838783  | 0.079292  | 37 | 8 | 0 | -4.330695  | 1.393658  | -0.025811 |
| 5   | 1    | 0    | 10.568556               | 2.05822   | 0.116786  | 38 | 6 | 0 | -5.287802  | 0.332146  | -0.018052 |
| 6   | 6    | 0    | 11.949928               | -1.557636 | -0.038006 | 39 | 1 | 0 | -5.140655  | -0.29632  | -0.905148 |
| 7   | 1    | 0    | 9.89131                 | -2.168878 | -0.088242 | 40 | 1 | 0 | -5.136534  | -0.286743 | 0.875072  |
| 8   | 6    | 0    | 12.832616               | -0.469497 | 0.022839  | 41 | 6 | 0 | -6.671776  | 0.949835  | -0.01807  |
| 9   | 1    | 0    | 13.031653               | 1.675848  | 0.125849  | 42 | 1 | 0 | -6.769893  | 1.600356  | 0.859575  |
| 10  | 1    | 0    | 12.341671               | -2.567979 | -0.082611 | 43 | 1 | 0 | -6.77578   | 1.587804  | -0.904213 |
| 11  | 7    | 0    | 7.933188                | -0.662705 | -0.00811  | 44 | 6 | 0 | -7.773191  | -0.109707 | -0.006646 |
| 12  | 7    | 0    | 8.712307                | 0.31044   | 0.016951  | 45 | 1 | 0 | -7.655232  | -0.751142 | 0.877518  |
| 13  | 6    | 0    | 14.249051               | -0.703064 | 0.026117  | 46 | 1 | 0 | -7.660856  | -0.764676 | -0.881571 |
| 14  | 7    | 0    | 15.391293               | -0.892053 | 0.028809  | 47 | 6 | 0 | -9.17758   | 0.492663  | -0.006718 |
| 15  | 6    | 0    | 6.554171                | -0.343074 | -0.010144 | 48 | 1 | 0 | -9.289547  | 1.149729  | 0.867013  |
| 16  | 6    | 0    | 5.684417                | -1.434547 | -0.024046 | 49 | 1 | 0 | -9.296481  | 1.133564  | -0.891466 |
| 17  | 6    | 0    | 6.04155                 | 0.960575  | -0.000152 | 50 | 6 | 0 | -10.285712 | -0.559142 | 0.007485  |
| 18  | 6    | 0    | 4.31176                 | -1.236995 | -0.026674 | 51 | 1 | 0 | -10.165349 | -1.20001  | 0.892406  |
| 19  | 1    | 0    | 6.100842                | -2.4367   | -0.032277 | 52 | 1 | 0 | -10.172131 | -1.216863 | -0.865892 |
| 20  | 6    | 0    | 4.673318                | 1.158763  | -0.003465 | 53 | 6 | 0 | -11.691404 | 0.039958  | 0.007219  |
| 21  | 1    | 0    | 6.721069                | 1.804444  | 0.009743  | 54 | 1 | 0 | -11.804424 | 0.698715  | 0.87994   |
| 22  | 6    | 0    | 3.787922                | 0.063826  | -0.016398 | 55 | 1 | 0 | -11.812059 | 0.680172  | -0.878182 |
| 23  | 1    | 0    | 3.637428                | -2.086513 | -0.036942 | 56 | 6 | 0 | -12.800375 | -1.01123  | 0.023217  |
| 24  | 1    | 0    | 4.270282                | 2.166092  | 0.003921  | 57 | 1 | 0 | -12.679588 | -1.651322 | 0.908765  |
| 25  | 6    | 0    | 2.376457                | 0.27792   | -0.01913  | 58 | 1 | 0 | -12.687157 | -1.670238 | -0.849362 |
| 26  | 6    | 0    | 1.178422                | 0.458509  | -0.020941 | 59 | 6 | 0 | -14.206408 | -0.41317  | 0.022864  |
| 27  | 6    | 0    | -0.233999               | 0.672409  | -0.022666 | 60 | 1 | 0 | -14.3206   | 0.246209  | 0.895178  |
| 28  | 6    | 0    | -1.122723               | -0.408309 | -0.018851 | 61 | 1 | 0 | -14.328572 | 0.226505  | -0.862935 |
| 29  | 6    | 0    | -0.764307               | 1.975232  | -0.027842 | 62 | 6 | 0 | -15.315976 | -1.46382  | 0.039697  |
| 30  | 6    | 0    | -2.499403               | -0.210173 | -0.019749 | 63 | 1 | 0 | -15.194514 | -2.102634 | 0.924842  |
| 31  | 1    | 0    | -0.731724               | -1.42075  | -0.014907 | 64 | 1 | 0 | -15.202464 | -2.122425 | -0.831895 |
| 32  | 6    | 0    | -2.130718               | 2.18096   | -0.028966 | 65 | 6 | 0 | -16.716732 | -0.855111 | 0.039176  |
| 33  | 1    | 0    | -0.091058               | 2.826429  | -0.030912 | 66 | 1 | 0 | -17.491111 | -1.629635 | 0.051352  |
|     |      |      |                         |           |           | 67 | 1 | 0 | -16.869186 | -0.216832 | 0.917452  |
|     |      |      |                         |           |           | 68 | 1 | 0 | -16.877146 | -0.236692 | -0.851799 |



**Table S7.** Cartesian coordinates of optimized geometry for **1b**.

| No. | Atom | Type | Coordinates (Angstroms) |           |           |    |   |   |           |           |           |
|-----|------|------|-------------------------|-----------|-----------|----|---|---|-----------|-----------|-----------|
|     | No.  |      | x                       | y         | z         |    |   |   |           |           |           |
| 1   | 6    | 0    | -13.497403              | -0.132891 | 0.016286  | 34 | 6 | 0 | -0.424999 | 1.31638   | -0.035957 |
| 2   | 6    | 0    | -14.408253              | 0.923217  | 0.039185  | 35 | 1 | 0 | -0.229786 | -0.839917 | 0.008788  |
| 3   | 6    | 0    | -13.94956               | -1.457161 | -0.002469 | 36 | 1 | 0 | -0.93742  | 3.399531  | -0.078591 |
| 4   | 6    | 0    | -15.772357              | 0.669652  | 0.045182  | 37 | 8 | 0 | 0.889307  | 1.64876   | -0.04421  |
| 5   | 1    | 0    | -14.033276              | 1.941008  | 0.052541  | 38 | 6 | 0 | 1.868311  | 0.608488  | -0.020389 |
| 6   | 6    | 0    | -15.308512              | -1.716767 | 0.002762  | 39 | 1 | 0 | 1.733628  | 0.002941  | 0.884474  |
| 7   | 1    | 0    | -13.232742              | -2.268766 | -0.021326 | 40 | 1 | 0 | 1.732488  | -0.039328 | -0.895249 |
| 8   | 6    | 0    | -16.222616              | -0.653426 | 0.026931  | 41 | 6 | 0 | 3.238606  | 1.256111  | -0.037035 |
| 9   | 1    | 0    | -16.484314              | 1.48731   | 0.06354   | 42 | 1 | 0 | 3.327284  | 1.876384  | -0.937161 |
| 10  | 1    | 0    | -15.67038               | -2.739059 | -0.011954 | 43 | 1 | 0 | 3.324867  | 1.927063  | 0.826192  |
| 11  | 7    | 0    | -11.320468              | -0.70663  | 0.0088    | 44 | 6 | 0 | 4.360359  | 0.218782  | -0.005459 |
| 12  | 7    | 0    | -12.126356              | 0.244794  | 0.012224  | 45 | 1 | 0 | 4.256232  | -0.461013 | -0.861868 |
| 13  | 6    | 0    | -17.631638              | -0.928167 | 0.032292  | 46 | 1 | 0 | 4.26242   | -0.40017  | 0.896562  |
| 14  | 7    | 0    | -18.767858              | -1.150488 | 0.036645  | 47 | 6 | 0 | 5.750446  | 0.85209   | -0.0329   |
| 15  | 6    | 0    | -9.950756               | -0.349591 | 0.003009  | 48 | 1 | 0 | 5.852508  | 1.466325  | -0.937524 |
| 16  | 6    | 0    | -9.051902               | -1.417319 | 0.006974  | 49 | 1 | 0 | 5.856623  | 1.534727  | 0.82084   |
| 17  | 6    | 0    | -9.473555               | 0.967401  | -0.006673 | 50 | 6 | 0 | 6.869887  | -0.187544 | 0.005442  |
| 18  | 6    | 0    | -7.685132               | -1.182807 | 0.002028  | 51 | 1 | 0 | 6.766794  | -0.867491 | -0.847876 |
| 19  | 1    | 0    | -9.441223               | -2.430325 | 0.014127  | 52 | 1 | 0 | 6.774224  | -0.794747 | 0.912272  |
| 20  | 6    | 0    | -8.111138               | 1.202469  | -0.012056 | 53 | 6 | 0 | 8.250293  | 0.47216   | -0.029321 |
| 21  | 1    | 0    | -10.175794              | 1.792519  | -0.010128 | 54 | 1 | 0 | 8.361995  | 1.078235  | -0.932825 |
| 22  | 6    | 0    | -7.196611               | 0.131711  | -0.007641 | 55 | 1 | 0 | 8.379443  | 1.137649  | 0.830641  |
| 23  | 1    | 0    | -6.987989               | -2.013778 | 0.005315  | 56 | 6 | 0 | 9.374623  | -0.535308 | -0.006257 |
| 24  | 1    | 0    | -7.735494               | 2.22034   | -0.01978  | 57 | 6 | 0 | 10.788619 | 0.10024   | 0.026709  |
| 25  | 6    | 0    | -5.791213               | 0.382596  | -0.013277 | 58 | 6 | 0 | 11.977818 | -0.870583 | -0.218235 |
| 26  | 6    | 0    | -4.59781                | 0.591456  | -0.018084 | 59 | 6 | 0 | 13.368142 | -0.311696 | 0.191683  |
| 27  | 6    | 0    | -3.190592               | 0.83731   | -0.024009 | 60 | 9 | 0 | 14.315157 | -1.136085 | -0.261923 |
| 28  | 6    | 0    | -2.278172               | -0.223252 | -0.002709 | 61 | 9 | 0 | 13.477954 | -0.23086  | 1.517819  |
| 29  | 6    | 0    | -2.68939                | 2.151283  | -0.051399 | 62 | 9 | 0 | 13.56685  | 0.899134  | -0.335589 |
| 30  | 6    | 0    | -0.906237               | 0.005325  | -0.008319 | 63 | 9 | 0 | 11.791832 | -2.0148   | 0.470654  |
| 31  | 1    | 0    | -2.646615               | -1.243899 | 0.018641  | 64 | 9 | 0 | 10.855532 | 1.063237  | -0.922177 |
| 32  | 6    | 0    | -1.327797               | 2.387201  | -0.057391 | 65 | 9 | 0 | 9.277635  | -1.347321 | 1.08767   |
| 33  | 1    | 0    | -3.38134                | 2.987183  | -0.068081 | 66 | 9 | 0 | 12.034893 | -1.161558 | -1.533053 |
|     |      |      |                         |           |           | 67 | 9 | 0 | 9.326545  | -1.351064 | -1.104283 |
|     |      |      |                         |           |           | 68 | 9 | 0 | 10.956647 | 0.690353  | 1.234772  |

**Table S8.** Cartesian coordinates of optimized geometry for **1c**.

| No. | Atom | Type | Coordinates (Angstroms) |           |           |    |   |   |           |           |           |
|-----|------|------|-------------------------|-----------|-----------|----|---|---|-----------|-----------|-----------|
|     | No.  |      | x                       | y         | z         |    |   |   |           |           |           |
| 1   | 6    | 0    | -14.204774              | -0.108406 | -0.025221 | 34 | 6 | 0 | -1.12554  | 1.261995  | 0.050878  |
| 2   | 6    | 0    | -15.108159              | 0.953852  | 0.007068  | 35 | 1 | 0 | -0.939576 | -0.8956   | 0.033395  |
| 3   | 6    | 0    | -14.666234              | -1.428824 | -0.070383 | 36 | 1 | 0 | -1.627561 | 3.347965  | 0.067616  |
| 4   | 6    | 0    | -16.474046              | 0.710331  | -0.004246 | 37 | 8 | 0 | 0.191039  | 1.588876  | 0.057714  |
| 5   | 1    | 0    | -14.725925              | 1.968447  | 0.041254  | 38 | 6 | 0 | 1.163874  | 0.544932  | 0.048746  |
| 6   | 6    | 0    | -16.027027              | -1.678405 | -0.082342 | 39 | 1 | 0 | 1.029581  | -0.088267 | 0.934408  |
| 7   | 1    | 0    | -13.955197              | -2.24532  | -0.095886 | 40 | 1 | 0 | 1.027618  | -0.074791 | -0.846053 |
| 8   | 6    | 0    | -16.933625              | -0.608899 | -0.049066 | 41 | 6 | 0 | 2.534384  | 1.193674  | 0.051626  |
| 9   | 1    | 0    | -17.180201              | 1.532814  | 0.021161  | 42 | 1 | 0 | 2.621612  | 1.843061  | -0.827331 |
| 10  | 1    | 0    | -16.396141              | -2.697599 | -0.117494 | 43 | 1 | 0 | 2.623194  | 1.833505  | 0.937313  |
| 11  | 7    | 0    | -12.031767              | -0.697317 | -0.02773  | 44 | 6 | 0 | 3.64967   | 0.148776  | 0.044633  |
| 12  | 7    | 0    | -12.831129              | 0.259402  | -0.009904 | 45 | 1 | 0 | 3.547243  | -0.496169 | -0.834557 |
| 13  | 6    | 0    | -18.344589              | -0.873286 | -0.061574 | 46 | 1 | 0 | 3.560025  | -0.493674 | 0.927658  |
| 14  | 7    | 0    | -19.482379              | -1.087223 | -0.07168  | 47 | 6 | 0 | 5.02701   | 0.814931  | 0.034219  |
| 15  | 6    | 0    | -10.659621              | -0.349621 | -0.014162 | 48 | 1 | 0 | 5.147409  | 1.433118  | -0.861417 |
| 16  | 6    | 0    | -9.767955               | -1.423249 | -0.028716 | 49 | 1 | 0 | 5.143419  | 1.468593  | 0.902995  |
| 17  | 6    | 0    | -10.173677              | 0.963943  | 0.011556  | 50 | 6 | 0 | 6.152856  | -0.191626 | 0.05861   |
| 18  | 6    | 0    | -8.399636               | -1.198029 | -0.017531 | 51 | 6 | 0 | 7.563842  | 0.444918  | -0.044521 |
| 19  | 1    | 0    | -10.164034              | -2.43345  | -0.048837 | 52 | 6 | 0 | 8.758408  | -0.506494 | 0.2626    |
| 20  | 6    | 0    | -8.809728               | 1.189747  | 0.022431  | 53 | 6 | 0 | 10.128891 | 0.018959  | -0.264436 |
| 21  | 1    | 0    | -10.870336              | 1.793707  | 0.022455  | 54 | 6 | 0 | 11.358969 | -0.661043 | 0.40478   |
| 22  | 6    | 0    | -7.902431               | 0.112971  | 0.008104  | 55 | 6 | 0 | 12.695998 | -0.471015 | -0.363917 |
| 23  | 1    | 0    | -7.708093               | -2.033592 | -0.028823 | 56 | 9 | 0 | 13.698198 | -0.894927 | 0.407293  |
| 24  | 1    | 0    | -8.427267               | 2.204908  | 0.042095  | 57 | 9 | 0 | 12.890935 | 0.81755   | -0.653924 |
| 25  | 6    | 0    | -6.495419               | 0.354742  | 0.018945  | 58 | 9 | 0 | 12.699798 | -1.177563 | -1.493246 |
| 26  | 6    | 0    | -5.300902               | 0.556749  | 0.027402  | 59 | 9 | 0 | 11.521754 | -0.144646 | 1.636581  |
| 27  | 6    | 0    | -3.892451               | 0.7957    | 0.0136324 | 60 | 9 | 0 | 10.1874   | -0.197822 | -1.594138 |
| 28  | 6    | 0    | -2.985101               | -0.269333 | 0.030701  | 61 | 9 | 0 | 8.846844  | -0.662899 | 1.600311  |
| 29  | 6    | 0    | -3.385371               | 2.107578  | 0.050176  | 62 | 9 | 0 | 11.137707 | -1.986941 | 0.51065   |
| 30  | 6    | 0    | -1.612077               | -0.046993 | 0.037979  | 63 | 9 | 0 | 8.53324   | -1.710221 | -0.299048 |
| 31  | 1    | 0    | -3.358202               | -1.288423 | 0.020317  | 64 | 9 | 0 | 10.214043 | 1.34535   | -0.037868 |
| 32  | 6    | 0    | -2.022695               | 2.337337  | 0.057315  | 65 | 9 | 0 | 7.634964  | 1.480481  | 0.822602  |
| 33  | 1    | 0    | -4.07348                | 2.946762  | 0.054926  | 66 | 9 | 0 | 7.713023  | 0.932712  | -1.299348 |
|     |      |      |                         |           |           | 67 | 9 | 0 | 6.126314  | -0.928857 | 1.211296  |
|     |      |      |                         |           |           | 68 | 9 | 0 | 6.035498  | -1.076274 | -0.974445 |
